# Supplementary material for: New genes drive the evolution of gene interaction networks in the human and mouse genomes
Source: PubMed Central journal article supplement (PMC4590697; doi:10.1186/s13059-015-0772-4), 2015-10-01
Supplement: 13059_2015_772_MOESM2_ESM.pdf [file 13059_2015_772_MOESM2_ESM.pdf]

**Table S1: General characteristics of GGI networks**

| <b>Organism</b> | <b>Network type</b>                                       | <b>#Nodes</b> | <b>#Interactions</b> | <b>&lt;K&gt;</b> | <b>Y</b> | <b>C</b> | <b>C<sub>rand</sub></b> | <b>l</b> | <b>l<sub>rand</sub></b> |
|-----------------|-----------------------------------------------------------|---------------|----------------------|------------------|----------|----------|-------------------------|----------|-------------------------|
| <b>Human</b>    | <b>PPI network</b><br>(HIPPIE, <sup>1</sup> Cutoff: 0.68) | 13987         | 130761*2             | 18.7             | 1.50     | 0.051    | 0.0013                  | 3.34     | 3.60                    |
|                 | <b>PPI network</b><br>(HIPPIE, <sup>1</sup> Cutoff: 0.77) | 9656          | 45842*2              | 9.5              | 1.67     | 0.071    | 0.0012                  | 3.97     | 4.33                    |
|                 | <b>PPI network</b><br>(HPRD)                              | 8621          | 32342*2              | 7.5              | 1.81     | 0.055    | 0.0008                  | 4.26     | 4.7                     |
|                 | <b>GC network</b><br>( <sup>2</sup> Cutoff: 0.4)          | 13123         | 794265*2             | 121              | 1.19     | 0.457    | 0.0092                  | 3.23     | 2.32                    |
| <b>Mouse</b>    | <b>PPI network</b><br>( <sup>1</sup> Cutoff: 0.68)        | 4633          | 9921*2               | 4.3              | 1.49     | 0.029    | 0.0010                  | 4.36     | 6.04                    |

**Abbreviations:**

PPI: Protein-Protein Interaction; GC: Gene Co-expression;

<sup>1</sup>Confidence score; <sup>2</sup>Pearson correlation coefficient;

#Nodes: Number of nodes; #Interactions: Number of interacting links; <K>: Average connectivity (degree) of network;

Y: Degree exponent of scale-free network; C: Clustering coefficient of network; l: Average path length of network;

C<sub>rand</sub>, l<sub>rand</sub>: Clustering coefficient and average path length of random network with the same numbers of nodes and interactions.
