# Supplementary material for: New genes drive the evolution of gene interaction networks in the human and mouse genomes
Source: PubMed Central journal article supplement (PMC4590697; doi:10.1186/s13059-015-0772-4), 2015-10-01
Supplement: 13059_2015_772_MOESM4_ESM.pdf [file 13059_2015_772_MOESM4_ESM.pdf]

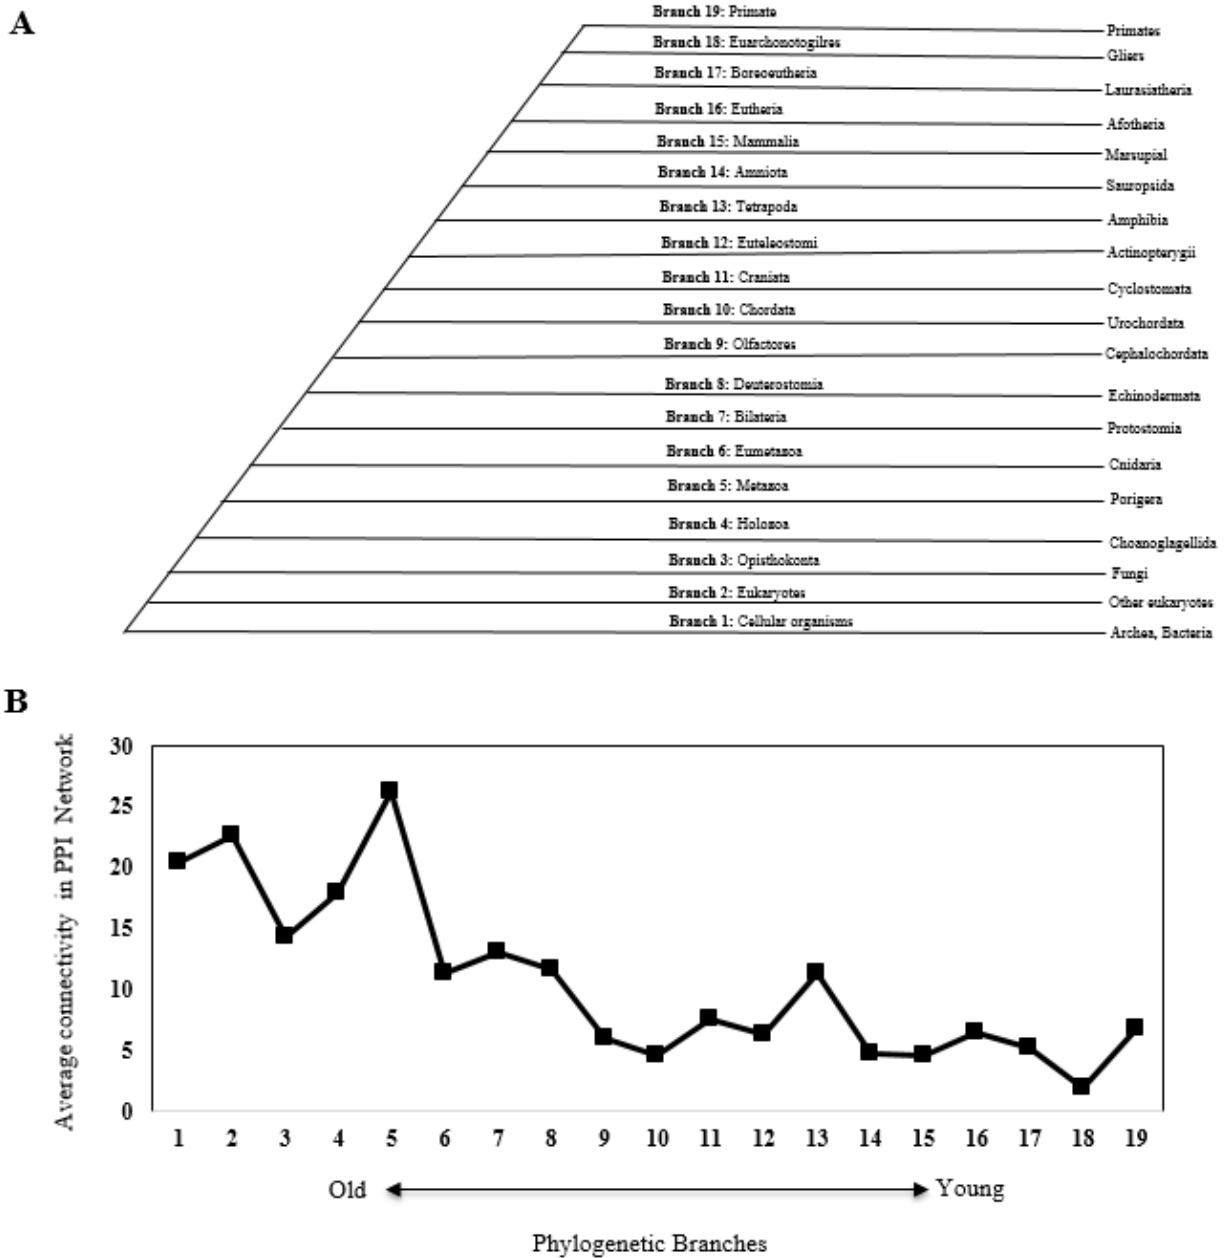

**Figure S3 PPI network topological patterns of human genes in relation to their phylogenetic groups. (A) Phylogenetic tree of life towards human from another dataset. (B) Distribution of PPI network connectivity (numbers of interactions) for genes from different phylogenetic branches.**
