# Supplementary material for: New genes drive the evolution of gene interaction networks in the human and mouse genomes
Source: PubMed Central journal article supplement (PMC4590697; doi:10.1186/s13059-015-0772-4), 2015-10-01
Supplement: 13059_2015_772_MOESM5_ESM.pdf [file 13059_2015_772_MOESM5_ESM.pdf]

**Table S2:** Summary of Mouse PPI datasets integrated in this study

| <b>PPI dataset</b> | <b>Version</b> | <b>Data Size *</b> | <b>Reference (PMID)</b> |
|--------------------|----------------|--------------------|-------------------------|
| BioGrid            | V-3.1.94       | 7372               | 16381927                |
| DIP                | 2012.08.18     | 414                | 10592249                |
| Intact             | 2012.10.04     | 8933               | 14681455                |
| MINT               | 2012-10-29     | 2425               | 17135203                |
| MPPI               | 2012-03-02     | 464                | 15531608                |
| <b>Total</b>       |                | 19608              |                         |

**\*Data Size:** Number of interactions within the dataset.
