# Supplementary material for: New genes drive the evolution of gene interaction networks in the human and mouse genomes
Source: PubMed Central journal article supplement (PMC4590697; doi:10.1186/s13059-015-0772-4), 2015-10-01
Supplement: 13059_2015_772_MOESM7_ESM.pdf [file 13059_2015_772_MOESM7_ESM.pdf]

**Table S3: Summary of human gene essentiality data used in this study.**

| Phylogenetic branch | Ensembl ID      | Associating disease and OMIM ID                         | Cause Death prior to puberty | Cause Infertility | Evidence from cell line experiments | Evidence from text mining | Evidence from mouse essential orthologs |
|---------------------|-----------------|---------------------------------------------------------|------------------------------|-------------------|-------------------------------------|---------------------------|-----------------------------------------|
| 11                  | ENSG00000126524 | -                                                       | -                            | -                 | YES                                 | NO                        | YES                                     |
| 9                   | ENSG00000198670 | -                                                       | -                            | -                 | YES                                 | YES                       | NO                                      |
| 5                   | ENSG00000095752 | -                                                       | -                            | -                 | YES                                 | YES                       | NO                                      |
| 5                   | ENSG00000105568 | -                                                       | -                            | -                 | YES                                 | NO                        | YES                                     |
| 5                   | ENSG00000107262 | -                                                       | -                            | -                 | NO                                  | YES                       | YES                                     |
| 5                   | ENSG00000135446 | -                                                       | -                            | -                 | YES                                 | NO                        | YES                                     |
| 5                   | ENSG00000143546 | -                                                       | -                            | -                 | YES                                 | NO                        | YES                                     |
| 5                   | ENSG00000164399 | -                                                       | -                            | -                 | YES                                 | YES                       | NO                                      |
| 5                   | ENSG00000164400 | -                                                       | -                            | -                 | YES                                 | YES                       | YES                                     |
| 5                   | ENSG00000177143 | -                                                       | -                            | -                 | YES                                 | YES                       | NO                                      |
| 5                   | ENSG00000179142 | Corticosterone methyloxidase type II deficiency, 610600 | YES                          | NO                | NO                                  | NO                        | YES                                     |
| 5                   | ENSG00000182636 | -                                                       | -                            | -                 | YES                                 | NO                        | YES                                     |
| 5                   | ENSG00000183734 | -                                                       | -                            | -                 | NO                                  | YES                       | YES                                     |
| 5                   | ENSG00000185479 | -                                                       | -                            | -                 | YES                                 | NO                        | YES                                     |
| 4                   | ENSG00000104432 | -                                                       | -                            | -                 | YES                                 | YES                       | NO                                      |
| 4                   | ENSG00000108518 | -                                                       | -                            | -                 | YES                                 | NO                        | YES                                     |
| 4                   | ENSG00000115297 | -                                                       | -                            | -                 | NO                                  | YES                       | YES                                     |
| 4                   | ENSG00000125538 | -                                                       | -                            | -                 | YES                                 | YES                       | NO                                      |
| 4                   | ENSG00000131462 | -                                                       | -                            | -                 | YES                                 | NO                        | YES                                     |
| 4                   | ENSG00000162244 | -                                                       | -                            | -                 | YES                                 | NO                        | YES                                     |
| 4                   | ENSG00000163554 | -                                                       | -                            | -                 | NO                                  | YES                       | YES                                     |
| 4                   | ENSG00000164885 | -                                                       | -                            | -                 | YES                                 | YES                       | YES                                     |
| 4                   | ENSG00000173805 | -                                                       | -                            | -                 | NO                                  | YES                       | YES                                     |
| 4                   | ENSG00000184500 | -                                                       | -                            | -                 | NO                                  | YES                       | YES                                     |
| 4                   | ENSG00000204256 | -                                                       | -                            | -                 | YES                                 | NO                        | YES                                     |
| 3                   | ENSG00000002330 | -                                                       | -                            | -                 | YES                                 | YES                       | NO                                      |
| 3                   | ENSG00000028137 | -                                                       | -                            | -                 | YES                                 | YES                       | NO                                      |
| 3                   | ENSG00000049540 | -                                                       | -                            | -                 | NO                                  | YES                       | YES                                     |
| 3                   | ENSG00000055332 | -                                                       | -                            | -                 | YES                                 | YES                       | NO                                      |
| 3                   | ENSG00000070814 | -                                                       | -                            | -                 | YES                                 | NO                        | YES                                     |
| 3                   | ENSG00000102265 | -                                                       | -                            | -                 | YES                                 | YES                       | NO                                      |
| 3                   | ENSG00000104164 | -                                                       | -                            | -                 | YES                                 | YES                       | NO                                      |
| 3                   | ENSG00000106331 | -                                                       | -                            | -                 | YES                                 | NO                        | YES                                     |
| 3                   | ENSG00000111321 | -                                                       | -                            | -                 | YES                                 | YES                       | NO                                      |
| 3                   | ENSG00000113520 | -                                                       | -                            | -                 | YES                                 | YES                       | NO                                      |
| 3                   | ENSG00000115008 | -                                                       | -                            | -                 | YES                                 | YES                       | NO                                      |
| 3                   | ENSG00000117525 | -                                                       | -                            | -                 | YES                                 | YES                       | YES                                     |
| 3                   | ENSG00000125726 | -                                                       | -                            | -                 | YES                                 | YES                       | NO                                      |
| 3                   | ENSG00000130427 | -                                                       | -                            | -                 | NO                                  | YES                       | YES                                     |
| 3                   | ENSG00000132535 | -                                                       | -                            | -                 | YES                                 | NO                        | YES                                     |
| 3                   | ENSG00000133710 | -                                                       | -                            | -                 | NO                                  | YES                       | YES                                     |

|   |                 |   |   |   |     |     |     |
|---|-----------------|---|---|---|-----|-----|-----|
| 3 | ENSG00000134460 | - | - | - | YES | YES | NO  |
| 3 | ENSG00000136244 | - | - | - | YES | YES | NO  |
| 3 | ENSG00000139193 | - | - | - | YES | YES | NO  |
| 3 | ENSG00000145839 | - | - | - | YES | YES | NO  |
| 3 | ENSG00000164825 | - | - | - | YES | NO  | YES |
| 3 | ENSG00000173327 | - | - | - | NO  | YES | YES |
| 3 | ENSG00000196154 | - | - | - | YES | NO  | YES |
| 2 | ENSG00000003436 | - | - | - | NO  | YES | YES |
| 2 | ENSG00000006634 | - | - | - | YES | YES | NO  |
| 2 | ENSG00000012048 | - | - | - | YES | YES | YES |
| 2 | ENSG00000014257 | - | - | - | YES | YES | NO  |
| 2 | ENSG00000026508 | - | - | - | YES | YES | NO  |
| 2 | ENSG00000030110 | - | - | - | YES | YES | NO  |
| 2 | ENSG00000049130 | - | - | - | NO  | YES | YES |
| 2 | ENSG00000073009 | - | - | - | NO  | YES | YES |
| 2 | ENSG00000085662 | - | - | - | YES | YES | NO  |
| 2 | ENSG00000089289 | - | - | - | YES | YES | NO  |
| 2 | ENSG00000091513 | - | - | - | YES | YES | YES |
| 2 | ENSG00000092330 | - | - | - | YES | NO  | YES |
| 2 | ENSG00000099810 | - | - | - | NO  | YES | YES |
| 2 | ENSG00000100387 | - | - | - | YES | NO  | YES |
| 2 | ENSG00000106991 | - | - | - | YES | YES | YES |
| 2 | ENSG00000107562 | - | - | - | NO  | YES | YES |
| 2 | ENSG00000108064 | - | - | - | YES | NO  | YES |
| 2 | ENSG00000114251 | - | - | - | YES | NO  | YES |
| 2 | ENSG00000115163 | - | - | - | YES | NO  | YES |
| 2 | ENSG00000117400 | - | - | - | YES | YES | NO  |
| 2 | ENSG00000128342 | - | - | - | YES | YES | YES |
| 2 | ENSG00000132604 | - | - | - | YES | YES | YES |
| 2 | ENSG00000132676 | - | - | - | YES | NO  | YES |
| 2 | ENSG00000134086 | - | - | - | YES | NO  | YES |
| 2 | ENSG00000134531 | - | - | - | YES | YES | NO  |
| 2 | ENSG00000134690 | - | - | - | YES | NO  | YES |
| 2 | ENSG00000135744 | - | - | - | NO  | YES | YES |
| 2 | ENSG00000136634 | - | - | - | YES | YES | NO  |
| 2 | ENSG00000137812 | - | - | - | YES | NO  | YES |
| 2 | ENSG00000145241 | - | - | - | YES | NO  | YES |
| 2 | ENSG00000147889 | - | - | - | YES | YES | NO  |
| 2 | ENSG00000162692 | - | - | - | YES | YES | YES |
| 2 | ENSG00000164045 | - | - | - | YES | YES | YES |
| 2 | ENSG00000166548 | - | - | - | YES | NO  | YES |
| 2 | ENSG00000167642 | - | - | - | NO  | YES | YES |
| 2 | ENSG00000168040 | - | - | - | YES | YES | YES |
| 2 | ENSG00000168878 | - | - | - | NO  | YES | YES |
| 2 | ENSG00000171867 | - | - | - | YES | YES | NO  |
| 2 | ENSG00000172613 | - | - | - | YES | NO  | YES |

|   |                 |                                                                                          |     |     |     |     |     |
|---|-----------------|------------------------------------------------------------------------------------------|-----|-----|-----|-----|-----|
| 2 | ENSG00000174697 | Obesity, severe, due to leptin deficiency;<br>Obesity, morbid, with hypogonadism, 601665 | NO  | YES | NO  | YES | NO  |
| 2 | ENSG00000175793 | -                                                                                        | -   | -   | YES | NO  | YES |
| 2 | ENSG00000178562 | -                                                                                        | -   | -   | YES | YES | NO  |
| 2 | ENSG00000184371 | -                                                                                        | -   | -   | YES | NO  | YES |
| 2 | ENSG00000187266 | -                                                                                        | -   | -   | YES | YES | YES |
| 2 | ENSG00000187608 | -                                                                                        | -   | -   | YES | YES | NO  |
| 2 | ENSG00000188690 | -                                                                                        | -   | -   | NO  | YES | YES |
| 2 | ENSG00000197905 | -                                                                                        | -   | -   | NO  | YES | YES |
| 2 | ENSG00000198125 | -                                                                                        | -   | -   | NO  | YES | YES |
| 1 | ENSG00000018236 | -                                                                                        | -   | -   | YES | YES | YES |
| 1 | ENSG00000049768 | -                                                                                        | -   | -   | NO  | YES | YES |
| 1 | ENSG00000067225 | -                                                                                        | -   | -   | YES | NO  | YES |
| 1 | ENSG00000078246 | -                                                                                        | -   | -   | YES | NO  | YES |
| 1 | ENSG00000078401 | -                                                                                        | -   | -   | NO  | YES | YES |
| 1 | ENSG00000090932 | Spondylocostal dysostosis, autosomal recessive,<br>1, 277300                             | YES | NO  | YES | NO  | YES |
| 1 | ENSG00000100311 | -                                                                                        | -   | -   | YES | NO  | YES |
| 1 | ENSG00000102678 | -                                                                                        | -   | -   | YES | NO  | YES |
| 1 | ENSG00000103241 | -                                                                                        | -   | -   | NO  | YES | YES |
| 1 | ENSG00000104320 | -                                                                                        | -   | -   | YES | YES | YES |
| 1 | ENSG00000105610 | -                                                                                        | -   | -   | YES | YES | YES |
| 1 | ENSG00000106089 | -                                                                                        | -   | -   | NO  | YES | YES |
| 1 | ENSG00000111319 | -                                                                                        | -   | -   | NO  | YES | YES |
| 1 | ENSG00000113594 | -                                                                                        | -   | -   | NO  | YES | YES |
| 1 | ENSG00000114166 | -                                                                                        | -   | -   | YES | YES | NO  |
| 1 | ENSG00000114200 | -                                                                                        | -   | -   | YES | YES | NO  |
| 1 | ENSG00000115310 | -                                                                                        | -   | -   | NO  | YES | YES |
| 1 | ENSG00000117560 | -                                                                                        | -   | -   | YES | YES | NO  |
| 1 | ENSG00000119888 | -                                                                                        | -   | -   | YES | NO  | YES |
| 1 | ENSG00000128714 | -                                                                                        | -   | -   | NO  | YES | YES |
| 1 | ENSG00000129991 | -                                                                                        | -   | -   | NO  | YES | YES |
| 1 | ENSG00000131477 | -                                                                                        | -   | -   | YES | NO  | YES |
| 1 | ENSG00000131747 | -                                                                                        | -   | -   | YES | YES | NO  |
| 1 | ENSG00000135374 | -                                                                                        | -   | -   | YES | NO  | YES |
| 1 | ENSG00000137270 | -                                                                                        | -   | -   | NO  | YES | YES |
| 1 | ENSG00000138279 | -                                                                                        | -   | -   | NO  | YES | YES |
| 1 | ENSG00000140650 | -                                                                                        | -   | -   | YES | YES | YES |
| 1 | ENSG00000145675 | -                                                                                        | -   | -   | YES | NO  | YES |
| 1 | ENSG00000148908 | -                                                                                        | -   | -   | YES | NO  | YES |
| 1 | ENSG00000152422 | -                                                                                        | -   | -   | YES | YES | YES |
| 1 | ENSG00000153094 | -                                                                                        | -   | -   | NO  | YES | YES |
| 1 | ENSG00000159399 | -                                                                                        | -   | -   | YES | NO  | YES |
| 1 | ENSG00000164867 | -                                                                                        | -   | -   | NO  | YES | YES |
| 1 | ENSG00000168447 | Autosomal recessive pseudohypoadosteronism<br>type I, 264350                             | YES | NO  | NO  | NO  | YES |

|   |                 |                                                                                                                   |     |    |     |     |     |
|---|-----------------|-------------------------------------------------------------------------------------------------------------------|-----|----|-----|-----|-----|
| 1 | ENSG00000170348 | -                                                                                                                 | -   | -  | YES | NO  | YES |
| 1 | ENSG00000172115 | -                                                                                                                 | -   | -  | YES | NO  | YES |
| 1 | ENSG00000172179 | -                                                                                                                 | -   | -  | YES | YES | NO  |
| 1 | ENSG00000176692 | -                                                                                                                 | -   | -  | YES | YES | YES |
| 1 | ENSG00000179776 | -                                                                                                                 | -   | -  | NO  | YES | YES |
| 1 | ENSG00000184047 | -                                                                                                                 | -   | -  | YES | YES | NO  |
| 1 | ENSG00000184408 | -                                                                                                                 | -   | -  | YES | YES | NO  |
| 1 | ENSG00000186395 | -                                                                                                                 | -   | -  | YES | NO  | YES |
| 1 | ENSG00000189403 | -                                                                                                                 | -   | -  | NO  | YES | YES |
| 1 | ENSG00000196811 | Lethal multiple pterygium syndrome, 253290                                                                        | YES | NO | NO  | YES | YES |
| 1 | ENSG00000196924 | -                                                                                                                 | -   | -  | NO  | YES | YES |
| 1 | ENSG00000206075 | -                                                                                                                 | -   | -  | YES | YES | YES |
| 0 | ENSG00000001084 | -                                                                                                                 | -   | -  | NO  | YES | YES |
| 0 | ENSG00000001626 | -                                                                                                                 | -   | -  | NO  | YES | YES |
| 0 | ENSG00000001630 | -                                                                                                                 | -   | -  | NO  | YES | YES |
| 0 | ENSG00000001631 | -                                                                                                                 | -   | -  | YES | YES | YES |
| 0 | ENSG00000002822 | -                                                                                                                 | -   | -  | YES | NO  | YES |
| 0 | ENSG00000003056 | -                                                                                                                 | -   | -  | YES | NO  | YES |
| 0 | ENSG00000004478 | -                                                                                                                 | -   | -  | YES | NO  | YES |
| 0 | ENSG00000004487 | -                                                                                                                 | -   | -  | YES | NO  | YES |
| 0 | ENSG00000004848 | -                                                                                                                 | -   | -  | NO  | YES | YES |
| 0 | ENSG00000004939 | -                                                                                                                 | -   | -  | YES | NO  | YES |
| 0 | ENSG00000004975 | -                                                                                                                 | -   | -  | YES | NO  | YES |
| 0 | ENSG00000005884 | -                                                                                                                 | -   | -  | YES | NO  | YES |
| 0 | ENSG00000007168 | Lissencephaly-1 (subcortical laminar heterotopia, included), 607432; Miller-Dieker lissencephaly syndrome, 247200 | YES | NO | NO  | YES | YES |
| 0 | ENSG00000007237 | -                                                                                                                 | -   | -  | YES | YES | NO  |
| 0 | ENSG00000007314 | -                                                                                                                 | -   | -  | NO  | YES | YES |
| 0 | ENSG00000007372 | -                                                                                                                 | -   | -  | NO  | YES | YES |
| 0 | ENSG00000008441 | -                                                                                                                 | -   | -  | NO  | YES | YES |
| 0 | ENSG00000008710 | -                                                                                                                 | -   | -  | YES | YES | YES |
| 0 | ENSG00000008988 | -                                                                                                                 | -   | -  | YES | NO  | YES |
| 0 | ENSG00000009413 | -                                                                                                                 | -   | -  | YES | YES | YES |
| 0 | ENSG00000010017 | -                                                                                                                 | -   | -  | YES | NO  | YES |
| 0 | ENSG00000010671 | -                                                                                                                 | -   | -  | YES | YES | NO  |
| 0 | ENSG00000010810 | -                                                                                                                 | -   | -  | YES | YES | NO  |
| 0 | ENSG00000011143 | -                                                                                                                 | -   | -  | NO  | YES | YES |
| 0 | ENSG00000011198 | -                                                                                                                 | -   | -  | NO  | YES | YES |
| 0 | ENSG00000011465 | -                                                                                                                 | -   | -  | YES | YES | NO  |
| 0 | ENSG00000012983 | -                                                                                                                 | -   | -  | YES | YES | NO  |
| 0 | ENSG00000013275 | -                                                                                                                 | -   | -  | YES | NO  | YES |
| 0 | ENSG00000013375 | -                                                                                                                 | -   | -  | NO  | YES | YES |
| 0 | ENSG00000017260 | -                                                                                                                 | -   | -  | NO  | YES | YES |
| 0 | ENSG00000017427 | -                                                                                                                 | -   | -  | YES | YES | YES |
| 0 | ENSG00000018408 | -                                                                                                                 | -   | -  | YES | NO  | YES |

|   |                 |                                                                                                                             |     |    |     |     |     |
|---|-----------------|-----------------------------------------------------------------------------------------------------------------------------|-----|----|-----|-----|-----|
| 0 | ENSG00000018510 | -                                                                                                                           | -   | -  | YES | NO  | YES |
| 0 | ENSG00000019991 | -                                                                                                                           | -   | -  | YES | YES | YES |
| 0 | ENSG00000020181 | -                                                                                                                           | -   | -  | YES | NO  | YES |
| 0 | ENSG00000020426 | -                                                                                                                           | -   | -  | YES | NO  | YES |
| 0 | ENSG00000020922 | -                                                                                                                           | -   | -  | NO  | YES | YES |
| 0 | ENSG00000021826 | Carbamoylphosphate synthetase I deficiency,<br>237300; Familial persistent pulmonary<br>hypertension of the newborn, 265380 | YES | NO | NO  | NO  | YES |
| 0 | ENSG00000023734 | -                                                                                                                           | -   | -  | YES | NO  | YES |
| 0 | ENSG00000025156 | -                                                                                                                           | -   | -  | NO  | YES | YES |
| 0 | ENSG00000026025 | -                                                                                                                           | -   | -  | YES | YES | NO  |
| 0 | ENSG00000026036 | -                                                                                                                           | -   | -  | NO  | YES | YES |
| 0 | ENSG00000027075 | -                                                                                                                           | -   | -  | YES | NO  | YES |
| 0 | ENSG00000028203 | -                                                                                                                           | -   | -  | NO  | YES | YES |
| 0 | ENSG00000029639 | -                                                                                                                           | -   | -  | NO  | YES | YES |
| 0 | ENSG00000030304 | -                                                                                                                           | -   | -  | YES | YES | YES |
| 0 | ENSG00000032444 | -                                                                                                                           | -   | -  | YES | YES | YES |
| 0 | ENSG00000034063 | -                                                                                                                           | -   | -  | YES | NO  | YES |
| 0 | ENSG00000035403 | -                                                                                                                           | -   | -  | NO  | YES | YES |
| 0 | ENSG00000036257 | -                                                                                                                           | -   | -  | YES | NO  | YES |
| 0 | ENSG00000036473 | -                                                                                                                           | -   | -  | NO  | YES | YES |
| 0 | ENSG00000038382 | -                                                                                                                           | -   | -  | YES | NO  | YES |
| 0 | ENSG00000038427 | -                                                                                                                           | -   | -  | NO  | YES | YES |
| 0 | ENSG00000039068 | -                                                                                                                           | -   | -  | YES | YES | YES |
| 0 | ENSG00000041982 | -                                                                                                                           | -   | -  | YES | YES | NO  |
| 0 | ENSG00000043355 | Holoprosencephaly-5, 609637                                                                                                 | YES | NO | NO  | NO  | YES |
| 0 | ENSG00000043462 | -                                                                                                                           | -   | -  | YES | NO  | YES |
| 0 | ENSG00000044524 | -                                                                                                                           | -   | -  | YES | NO  | YES |
| 0 | ENSG00000044574 | -                                                                                                                           | -   | -  | NO  | YES | YES |
| 0 | ENSG00000046604 | -                                                                                                                           | -   | -  | NO  | YES | YES |
| 0 | ENSG00000046651 | -                                                                                                                           | -   | -  | YES | YES | NO  |
| 0 | ENSG00000048052 | -                                                                                                                           | -   | -  | YES | YES | NO  |
| 0 | ENSG00000048707 | -                                                                                                                           | -   | -  | YES | NO  | YES |
| 0 | ENSG00000050748 | -                                                                                                                           | -   | -  | YES | YES | NO  |
| 0 | ENSG00000050820 | -                                                                                                                           | -   | -  | YES | NO  | YES |
| 0 | ENSG00000051180 | -                                                                                                                           | -   | -  | YES | YES | YES |
| 0 | ENSG00000051382 | -                                                                                                                           | -   | -  | YES | NO  | YES |
| 0 | ENSG00000053747 | -                                                                                                                           | -   | -  | NO  | YES | YES |
| 0 | ENSG00000055118 | -                                                                                                                           | -   | -  | NO  | YES | YES |
| 0 | ENSG00000055130 | -                                                                                                                           | -   | -  | YES | YES | YES |
| 0 | ENSG00000055208 | -                                                                                                                           | -   | -  | NO  | YES | YES |
| 0 | ENSG00000057593 | -                                                                                                                           | -   | -  | NO  | YES | YES |
| 0 | ENSG00000057663 | -                                                                                                                           | -   | -  | YES | NO  | YES |
| 0 | ENSG00000058085 | -                                                                                                                           | -   | -  | NO  | YES | YES |
| 0 | ENSG00000058272 | -                                                                                                                           | -   | -  | YES | NO  | YES |
| 0 | ENSG00000060069 | -                                                                                                                           | -   | -  | YES | YES | NO  |

|   |                 |                           |     |    |     |     |     |
|---|-----------------|---------------------------|-----|----|-----|-----|-----|
| 0 | ENSG00000060237 | -                         | -   | -  | YES | NO  | YES |
| 0 | ENSG00000060718 | -                         | -   | -  | YES | NO  | YES |
| 0 | ENSG00000064012 | -                         | -   | -  | NO  | YES | YES |
| 0 | ENSG00000064601 | Galactosialidosis, 256540 | YES | NO | NO  | YES | NO  |
| 0 | ENSG00000065328 | -                         | -   | -  | YES | YES | YES |
| 0 | ENSG00000065357 | -                         | -   | -  | YES | YES | NO  |
| 0 | ENSG00000065361 | -                         | -   | -  | YES | NO  | YES |
| 0 | ENSG00000065559 | -                         | -   | -  | YES | YES | YES |
| 0 | ENSG00000065911 | -                         | -   | -  | YES | NO  | YES |
| 0 | ENSG00000065978 | -                         | -   | -  | NO  | YES | YES |
| 0 | ENSG00000066044 | -                         | -   | -  | NO  | YES | YES |
| 0 | ENSG00000066056 | -                         | -   | -  | YES | YES | YES |
| 0 | ENSG00000066468 | -                         | -   | -  | YES | YES | YES |
| 0 | ENSG00000066827 | -                         | -   | -  | NO  | YES | YES |
| 0 | ENSG00000067560 | -                         | -   | -  | YES | YES | NO  |
| 0 | ENSG00000067596 | -                         | -   | -  | YES | YES | NO  |
| 0 | ENSG00000067715 | -                         | -   | -  | YES | NO  | YES |
| 0 | ENSG00000067955 | -                         | -   | -  | NO  | YES | YES |
| 0 | ENSG00000068024 | -                         | -   | -  | YES | NO  | YES |
| 0 | ENSG00000068078 | -                         | -   | -  | YES | YES | YES |
| 0 | ENSG00000068383 | -                         | -   | -  | YES | NO  | YES |
| 0 | ENSG00000068796 | -                         | -   | -  | YES | NO  | YES |
| 0 | ENSG00000069702 | -                         | -   | -  | YES | NO  | YES |
| 0 | ENSG00000069956 | -                         | -   | -  | YES | NO  | YES |
| 0 | ENSG00000070159 | -                         | -   | -  | YES | YES | NO  |
| 0 | ENSG00000070193 | -                         | -   | -  | YES | YES | YES |
| 0 | ENSG00000070444 | -                         | -   | -  | NO  | YES | YES |
| 0 | ENSG00000070495 | -                         | -   | -  | NO  | YES | YES |
| 0 | ENSG00000070501 | -                         | -   | -  | YES | NO  | YES |
| 0 | ENSG00000070748 | -                         | -   | -  | NO  | YES | YES |
| 0 | ENSG00000070831 | -                         | -   | -  | NO  | YES | YES |
| 0 | ENSG00000070950 | -                         | -   | -  | YES | YES | NO  |
| 0 | ENSG00000070961 | -                         | -   | -  | NO  | YES | YES |
| 0 | ENSG00000071054 | -                         | -   | -  | YES | NO  | YES |
| 0 | ENSG00000071189 | -                         | -   | -  | NO  | YES | YES |
| 0 | ENSG00000071539 | -                         | -   | -  | YES | NO  | YES |
| 0 | ENSG00000072062 | -                         | -   | -  | YES | NO  | YES |
| 0 | ENSG00000072274 | -                         | -   | -  | YES | YES | YES |
| 0 | ENSG00000072415 | -                         | -   | -  | YES | YES | NO  |
| 0 | ENSG00000072518 | -                         | -   | -  | YES | NO  | YES |
| 0 | ENSG00000073282 | -                         | -   | -  | NO  | YES | YES |
| 0 | ENSG00000073536 | -                         | -   | -  | YES | YES | YES |
| 0 | ENSG00000073614 | -                         | -   | -  | YES | NO  | YES |
| 0 | ENSG00000073712 | -                         | -   | -  | YES | NO  | YES |
| 0 | ENSG00000073756 | -                         | -   | -  | NO  | YES | YES |
| 0 | ENSG00000074047 | -                         | -   | -  | YES | YES | YES |

|   |                 |                                                                                     |     |    |     |     |     |
|---|-----------------|-------------------------------------------------------------------------------------|-----|----|-----|-----|-----|
| 0 | ENSG00000074201 | -                                                                                   | -   | -  | YES | NO  | YES |
| 0 | ENSG00000074266 | -                                                                                   | -   | -  | YES | YES | NO  |
| 0 | ENSG00000074319 | -                                                                                   | -   | -  | YES | NO  | YES |
| 0 | ENSG00000074590 | -                                                                                   | -   | -  | YES | NO  | YES |
| 0 | ENSG00000074800 | -                                                                                   | -   | -  | YES | NO  | YES |
| 0 | ENSG00000074803 | -                                                                                   | -   | -  | NO  | YES | YES |
| 0 | ENSG00000075213 | -                                                                                   | -   | -  | NO  | YES | YES |
| 0 | ENSG00000075413 | -                                                                                   | -   | -  | YES | NO  | YES |
| 0 | ENSG00000075426 | -                                                                                   | -   | -  | YES | NO  | YES |
| 0 | ENSG00000075618 | -                                                                                   | -   | -  | YES | YES | NO  |
| 0 | ENSG00000075624 | -                                                                                   | -   | -  | YES | NO  | YES |
| 0 | ENSG00000075711 | -                                                                                   | -   | -  | YES | YES | YES |
| 0 | ENSG00000075891 | Optic nerve coloboma with renal disease,<br>120330                                  | YES | NO | NO  | YES | YES |
| 0 | ENSG00000076003 | -                                                                                   | -   | -  | YES | NO  | YES |
| 0 | ENSG00000076201 | -                                                                                   | -   | -  | YES | YES | YES |
| 0 | ENSG00000076242 | -                                                                                   | -   | -  | YES | YES | YES |
| 0 | ENSG00000076604 | -                                                                                   | -   | -  | YES | NO  | YES |
| 0 | ENSG00000077044 | -                                                                                   | -   | -  | YES | NO  | YES |
| 0 | ENSG00000077097 | -                                                                                   | -   | -  | YES | NO  | YES |
| 0 | ENSG00000077235 | -                                                                                   | -   | -  | YES | NO  | YES |
| 0 | ENSG00000077279 | Lissencephaly, X-linked, 300067; Subcortical<br>laminal heteropia, X-linked, 300067 | YES | NO | NO  | YES | YES |
| 0 | ENSG00000077463 | -                                                                                   | -   | -  | NO  | YES | YES |
| 0 | ENSG00000077498 | -                                                                                   | -   | -  | NO  | YES | YES |
| 0 | ENSG00000077782 | Pfeiffer syndrome, 101600; Jackson-Weiss<br>syndrome, 123150                        | YES | NO | YES | YES | YES |
| 0 | ENSG00000078142 | -                                                                                   | -   | -  | YES | NO  | YES |
| 0 | ENSG00000079102 | -                                                                                   | -   | -  | NO  | YES | YES |
| 0 | ENSG00000079246 | -                                                                                   | -   | -  | YES | YES | YES |
| 0 | ENSG00000079335 | -                                                                                   | -   | -  | YES | YES | NO  |
| 0 | ENSG00000079616 | -                                                                                   | -   | -  | NO  | YES | YES |
| 0 | ENSG00000079805 | -                                                                                   | -   | -  | YES | NO  | YES |
| 0 | ENSG00000079999 | -                                                                                   | -   | -  | NO  | YES | YES |
| 0 | ENSG00000080493 | -                                                                                   | -   | -  | NO  | YES | YES |
| 0 | ENSG00000080618 | -                                                                                   | -   | -  | YES | NO  | YES |
| 0 | ENSG00000080815 | -                                                                                   | -   | -  | NO  | YES | YES |
| 0 | ENSG00000080824 | -                                                                                   | -   | -  | YES | YES | NO  |
| 0 | ENSG00000080839 | -                                                                                   | -   | -  | YES | NO  | YES |
| 0 | ENSG00000080986 | -                                                                                   | -   | -  | YES | YES | NO  |
| 0 | ENSG00000081237 | -                                                                                   | -   | -  | YES | NO  | YES |
| 0 | ENSG00000082175 | -                                                                                   | -   | -  | YES | YES | NO  |
| 0 | ENSG00000082258 | -                                                                                   | -   | -  | YES | NO  | YES |
| 0 | ENSG00000082293 | -                                                                                   | -   | -  | YES | NO  | YES |
| 0 | ENSG00000082458 | -                                                                                   | -   | -  | YES | YES | NO  |
| 0 | ENSG00000082701 | -                                                                                   | -   | -  | YES | NO  | YES |

|   |                 |                                                                                                                                              |     |    |     |     |     |
|---|-----------------|----------------------------------------------------------------------------------------------------------------------------------------------|-----|----|-----|-----|-----|
| 0 | ENSG00000083720 | -                                                                                                                                            | -   | -  | YES | NO  | YES |
| 0 | ENSG00000083857 | -                                                                                                                                            | -   | -  | NO  | YES | YES |
| 0 | ENSG00000084073 | -                                                                                                                                            | -   | -  | NO  | YES | YES |
| 0 | ENSG00000084754 | LCHAD deficiency, 609016; Trifunctional protein deficiency, 609015; HELLP syndrome, maternal, of pregnancy; Fatty liver, acute, of pregnancy | YES | NO | NO  | NO  | YES |
| 0 | ENSG00000085224 | -                                                                                                                                            | -   | -  | YES | NO  | YES |
| 0 | ENSG00000085563 | -                                                                                                                                            | -   | -  | YES | YES | NO  |
| 0 | ENSG00000085721 | -                                                                                                                                            | -   | -  | YES | NO  | YES |
| 0 | ENSG00000085733 | -                                                                                                                                            | -   | -  | YES | NO  | YES |
| 0 | ENSG00000085741 | -                                                                                                                                            | -   | -  | YES | NO  | YES |
| 0 | ENSG00000086232 | -                                                                                                                                            | -   | -  | YES | YES | NO  |
| 0 | ENSG00000087085 | -                                                                                                                                            | -   | -  | NO  | YES | YES |
| 0 | ENSG00000087087 | -                                                                                                                                            | -   | -  | NO  | YES | YES |
| 0 | ENSG00000087191 | -                                                                                                                                            | -   | -  | YES | YES | NO  |
| 0 | ENSG00000087274 | -                                                                                                                                            | -   | -  | NO  | YES | YES |
| 0 | ENSG00000087460 | -                                                                                                                                            | -   | -  | NO  | YES | YES |
| 0 | ENSG00000087470 | -                                                                                                                                            | -   | -  | YES | NO  | YES |
| 0 | ENSG00000087510 | -                                                                                                                                            | -   | -  | YES | NO  | YES |
| 0 | ENSG00000087586 | -                                                                                                                                            | -   | -  | YES | NO  | YES |
| 0 | ENSG00000088038 | -                                                                                                                                            | -   | -  | NO  | YES | YES |
| 0 | ENSG00000088305 | Immunodeficiency-centromeric instability-facial anomalies syndrome, 242860                                                                   | YES | NO | YES | YES | YES |
| 0 | ENSG00000088986 | -                                                                                                                                            | -   | -  | YES | YES | NO  |
| 0 | ENSG00000089225 | Holt-Oram syndrome, 142900                                                                                                                   | YES | NO | YES | NO  | YES |
| 0 | ENSG00000089280 | -                                                                                                                                            | -   | -  | YES | YES | YES |
| 0 | ENSG00000089685 | -                                                                                                                                            | -   | -  | YES | YES | YES |
| 0 | ENSG00000090020 | -                                                                                                                                            | -   | -  | NO  | YES | YES |
| 0 | ENSG00000090273 | -                                                                                                                                            | -   | -  | YES | YES | NO  |
| 0 | ENSG00000091140 | Lipoamide dehydrogenase deficiency, 238331                                                                                                   | YES | NO | NO  | NO  | YES |
| 0 | ENSG00000091409 | Epidermolysis bullosa, junctional, with pyloric stenosis, 226730                                                                             | YES | NO | YES | YES | YES |
| 0 | ENSG00000091483 | Fumarase deficiency, 606812                                                                                                                  | YES | NO | YES | NO  | YES |
| 0 | ENSG00000091831 | -                                                                                                                                            | -   | -  | YES | YES | NO  |
| 0 | ENSG00000092199 | -                                                                                                                                            | -   | -  | YES | NO  | YES |
| 0 | ENSG00000092295 | -                                                                                                                                            | -   | -  | NO  | YES | YES |
| 0 | ENSG00000092439 | -                                                                                                                                            | -   | -  | YES | YES | YES |
| 0 | ENSG00000092531 | -                                                                                                                                            | -   | -  | YES | NO  | YES |
| 0 | ENSG00000092621 | -                                                                                                                                            | -   | -  | NO  | YES | YES |
| 0 | ENSG00000092820 | -                                                                                                                                            | -   | -  | NO  | YES | YES |
| 0 | ENSG00000092969 | -                                                                                                                                            | -   | -  | YES | YES | YES |
| 0 | ENSG00000093009 | -                                                                                                                                            | -   | -  | YES | NO  | YES |
| 0 | ENSG00000094804 | -                                                                                                                                            | -   | -  | YES | YES | NO  |
| 0 | ENSG00000094880 | -                                                                                                                                            | -   | -  | YES | YES | NO  |
| 0 | ENSG00000095015 | -                                                                                                                                            | -   | -  | YES | YES | NO  |



|   |                 |                                      |     |    |     |     |     |
|---|-----------------|--------------------------------------|-----|----|-----|-----|-----|
| 0 | ENSG00000095370 | -                                    | -   | -  | NO  | YES | YES |
| 0 | ENSG00000096384 | -                                    | -   | -  | YES | NO  | YES |
| 0 | ENSG00000096696 | -                                    | -   | -  | NO  | YES | YES |
| 0 | ENSG00000096717 | -                                    | -   | -  | YES | NO  | YES |
| 0 | ENSG00000096968 | -                                    | -   | -  | YES | YES | YES |
| 0 | ENSG00000097007 | -                                    | -   | -  | YES | YES | YES |
| 0 | ENSG00000097046 | -                                    | -   | -  | YES | YES | YES |
| 0 | ENSG00000099194 | -                                    | -   | -  | YES | YES | YES |
| 0 | ENSG00000099804 | -                                    | -   | -  | YES | YES | NO  |
| 0 | ENSG00000099942 | -                                    | -   | -  | YES | NO  | YES |
| 0 | ENSG00000099956 | -                                    | -   | -  | NO  | YES | YES |
| 0 | ENSG00000099991 | -                                    | -   | -  | YES | NO  | YES |
| 0 | ENSG00000100029 | -                                    | -   | -  | YES | YES | YES |
| 0 | ENSG00000100030 | -                                    | -   | -  | YES | YES | YES |
| 0 | ENSG00000100033 | -                                    | -   | -  | YES | YES | NO  |
| 0 | ENSG00000100084 | -                                    | -   | -  | YES | NO  | YES |
| 0 | ENSG00000100138 | -                                    | -   | -  | YES | YES | NO  |
| 0 | ENSG00000100146 | -                                    | -   | -  | YES | YES | YES |
| 0 | ENSG00000100292 | -                                    | -   | -  | YES | YES | YES |
| 0 | ENSG00000100299 | Metachromatic leukodystrophy, 250100 | YES | NO | NO  | YES | NO  |
| 0 | ENSG00000100324 | -                                    | -   | -  | YES | NO  | YES |
| 0 | ENSG00000100345 | -                                    | -   | -  | NO  | YES | YES |
| 0 | ENSG00000100348 | -                                    | -   | -  | YES | NO  | YES |
| 0 | ENSG00000100393 | -                                    | -   | -  | YES | YES | YES |
| 0 | ENSG00000100401 | -                                    | -   | -  | NO  | YES | YES |
| 0 | ENSG00000100410 | -                                    | -   | -  | YES | YES | YES |
| 0 | ENSG00000100412 | -                                    | -   | -  | YES | YES | NO  |
| 0 | ENSG00000100462 | -                                    | -   | -  | YES | NO  | YES |
| 0 | ENSG00000100578 | -                                    | -   | -  | YES | YES | YES |
| 0 | ENSG00000100596 | -                                    | -   | -  | NO  | YES | YES |
| 0 | ENSG00000100697 | -                                    | -   | -  | NO  | YES | YES |
| 0 | ENSG00000100714 | -                                    | -   | -  | YES | NO  | YES |
| 0 | ENSG00000100764 | -                                    | -   | -  | YES | NO  | YES |
| 0 | ENSG00000100811 | -                                    | -   | -  | YES | NO  | YES |
| 0 | ENSG00000100815 | -                                    | -   | -  | NO  | YES | YES |
| 0 | ENSG00000100823 | -                                    | -   | -  | NO  | YES | YES |
| 0 | ENSG00000100906 | -                                    | -   | -  | YES | NO  | YES |
| 0 | ENSG00000101003 | -                                    | -   | -  | YES | NO  | YES |
| 0 | ENSG00000101115 | -                                    | -   | -  | YES | NO  | YES |
| 0 | ENSG00000101144 | -                                    | -   | -  | NO  | YES | YES |
| 0 | ENSG00000101146 | -                                    | -   | -  | YES | YES | YES |
| 0 | ENSG00000101190 | -                                    | -   | -  | YES | YES | NO  |
| 0 | ENSG00000101200 | -                                    | -   | -  | NO  | YES | YES |
| 0 | ENSG00000101246 | -                                    | -   | -  | NO  | YES | YES |
| 0 | ENSG00000101266 | -                                    | -   | -  | YES | NO  | YES |
| 0 | ENSG00000101290 | -                                    | -   | -  | YES | NO  | YES |

|   |                 |                                  |     |    |     |     |     |
|---|-----------------|----------------------------------|-----|----|-----|-----|-----|
| 0 | ENSG00000101384 | -                                | -   | -  | YES | YES | YES |
| 0 | ENSG00000101489 | -                                | -   | -  | NO  | YES | YES |
| 0 | ENSG00000101665 | -                                | -   | -  | YES | NO  | YES |
| 0 | ENSG00000101981 | Hemophilia B, 306900             | YES | NO | NO  | NO  | YES |
| 0 | ENSG00000102145 | -                                | -   | -  | NO  | YES | YES |
| 0 | ENSG00000102710 | -                                | -   | -  | NO  | YES | YES |
| 0 | ENSG00000102755 | -                                | -   | -  | YES | NO  | YES |
| 0 | ENSG00000102786 | -                                | -   | -  | YES | NO  | YES |
| 0 | ENSG00000102882 | -                                | -   | -  | YES | YES | NO  |
| 0 | ENSG00000102898 | -                                | -   | -  | YES | YES | NO  |
| 0 | ENSG00000103035 | -                                | -   | -  | YES | NO  | YES |
| 0 | ENSG00000103043 | -                                | -   | -  | YES | NO  | YES |
| 0 | ENSG00000103126 | -                                | -   | -  | NO  | YES | YES |
| 0 | ENSG00000103197 | -                                | -   | -  | YES | YES | YES |
| 0 | ENSG00000103245 | -                                | -   | -  | YES | NO  | YES |
| 0 | ENSG00000103275 | -                                | -   | -  | NO  | YES | YES |
| 0 | ENSG00000103423 | -                                | -   | -  | YES | YES | YES |
| 0 | ENSG00000103449 | Townes-Brocks syndrome, 107480   | YES | NO | NO  | NO  | YES |
| 0 | ENSG00000103479 | -                                | -   | -  | YES | NO  | YES |
| 0 | ENSG00000103494 | -                                | -   | -  | NO  | YES | YES |
| 0 | ENSG00000103507 | -                                | -   | -  | YES | NO  | YES |
| 0 | ENSG00000103510 | -                                | -   | -  | NO  | YES | YES |
| 0 | ENSG00000103653 | -                                | -   | -  | YES | YES | YES |
| 0 | ENSG00000103876 | Tyrosinemia type I, 276700       | YES | NO | NO  | YES | YES |
| 0 | ENSG00000104064 | -                                | -   | -  | YES | NO  | YES |
| 0 | ENSG00000104129 | -                                | -   | -  | YES | NO  | YES |
| 0 | ENSG00000104154 | -                                | -   | -  | NO  | YES | YES |
| 0 | ENSG00000104313 | -                                | -   | -  | NO  | YES | YES |
| 0 | ENSG00000104365 | -                                | -   | -  | YES | YES | YES |
| 0 | ENSG00000104517 | -                                | -   | -  | YES | NO  | YES |
| 0 | ENSG00000104763 | -                                | -   | -  | NO  | YES | YES |
| 0 | ENSG00000104812 | -                                | -   | -  | NO  | YES | YES |
| 0 | ENSG00000104852 | -                                | -   | -  | YES | YES | NO  |
| 0 | ENSG00000104856 | -                                | -   | -  | YES | YES | YES |
| 0 | ENSG00000104884 | -                                | -   | -  | NO  | YES | YES |
| 0 | ENSG00000105173 | -                                | -   | -  | YES | YES | NO  |
| 0 | ENSG00000105202 | -                                | -   | -  | YES | YES | YES |
| 0 | ENSG00000105220 | -                                | -   | -  | YES | NO  | YES |
| 0 | ENSG00000105258 | -                                | -   | -  | YES | YES | NO  |
| 0 | ENSG00000105325 | -                                | -   | -  | YES | NO  | YES |
| 0 | ENSG00000105329 | -                                | -   | -  | NO  | YES | YES |
| 0 | ENSG00000105372 | Anemia, Diamond-Blackfan, 105650 | YES | NO | NO  | NO  | YES |
| 0 | ENSG00000105397 | -                                | -   | -  | YES | YES | NO  |
| 0 | ENSG00000105402 | -                                | -   | -  | NO  | YES | YES |
| 0 | ENSG00000105426 | -                                | -   | -  | YES | NO  | YES |
| 0 | ENSG00000105486 | -                                | -   | -  | NO  | YES | YES |

|   |                 |                                                                         |     |    |     |     |     |
|---|-----------------|-------------------------------------------------------------------------|-----|----|-----|-----|-----|
| 0 | ENSG00000105612 | -                                                                       | -   | -  | NO  | YES | YES |
| 0 | ENSG00000105698 | -                                                                       | -   | -  | YES | NO  | YES |
| 0 | ENSG00000105699 | -                                                                       | -   | -  | NO  | YES | YES |
| 0 | ENSG00000105819 | -                                                                       | -   | -  | YES | NO  | YES |
| 0 | ENSG00000105976 | -                                                                       | -   | -  | YES | NO  | YES |
| 0 | ENSG00000105989 | -                                                                       | -   | -  | YES | NO  | YES |
| 0 | ENSG00000105997 | -                                                                       | -   | -  | NO  | YES | YES |
| 0 | ENSG00000106004 | -                                                                       | -   | -  | YES | NO  | YES |
| 0 | ENSG00000106038 | -                                                                       | -   | -  | YES | NO  | YES |
| 0 | ENSG00000106070 | -                                                                       | -   | -  | YES | YES | YES |
| 0 | ENSG00000106459 | -                                                                       | -   | -  | NO  | YES | YES |
| 0 | ENSG00000106462 | -                                                                       | -   | -  | NO  | YES | YES |
| 0 | ENSG00000106546 | -                                                                       | -   | -  | YES | YES | YES |
| 0 | ENSG00000106571 | -                                                                       | -   | -  | YES | YES | YES |
| 0 | ENSG00000106692 | Walker-Warburg syndrome, 236670                                         | YES | NO | NO  | NO  | YES |
| 0 | ENSG00000106799 | -                                                                       | -   | -  | YES | NO  | YES |
| 0 | ENSG00000106976 | -                                                                       | -   | -  | YES | NO  | YES |
| 0 | ENSG00000107187 | -                                                                       | -   | -  | NO  | YES | YES |
| 0 | ENSG00000107263 | -                                                                       | -   | -  | NO  | YES | YES |
| 0 | ENSG00000107485 | Hypoparathyroidism, sensorineural deafness, and renal dysplasia, 146255 | YES | NO | NO  | NO  | YES |
| 0 | ENSG00000107611 | -                                                                       | -   | -  | YES | NO  | YES |
| 0 | ENSG00000107643 | -                                                                       | -   | -  | YES | YES | NO  |
| 0 | ENSG00000107669 | -                                                                       | -   | -  | NO  | YES | YES |
| 0 | ENSG00000107779 | -                                                                       | -   | -  | YES | YES | YES |
| 0 | ENSG00000107831 | -                                                                       | -   | -  | NO  | YES | YES |
| 0 | ENSG00000107968 | -                                                                       | -   | -  | YES | NO  | YES |
| 0 | ENSG00000107984 | -                                                                       | -   | -  | NO  | YES | YES |
| 0 | ENSG00000108010 | -                                                                       | -   | -  | NO  | YES | YES |
| 0 | ENSG00000108175 | -                                                                       | -   | -  | YES | NO  | YES |
| 0 | ENSG00000108264 | -                                                                       | -   | -  | YES | YES | NO  |
| 0 | ENSG00000108306 | -                                                                       | -   | -  | NO  | YES | YES |
| 0 | ENSG00000108379 | -                                                                       | -   | -  | NO  | YES | YES |
| 0 | ENSG00000108381 | Canavan disease, 271900                                                 | YES | NO | NO  | YES | YES |
| 0 | ENSG00000108384 | -                                                                       | -   | -  | YES | NO  | YES |
| 0 | ENSG00000108424 | -                                                                       | -   | -  | YES | NO  | YES |
| 0 | ENSG00000108576 | -                                                                       | -   | -  | NO  | YES | YES |
| 0 | ENSG00000108578 | -                                                                       | -   | -  | NO  | YES | YES |
| 0 | ENSG00000108753 | -                                                                       | -   | -  | NO  | YES | YES |
| 0 | ENSG00000108821 | -                                                                       | -   | -  | YES | YES | YES |
| 0 | ENSG00000108840 | -                                                                       | -   | -  | YES | YES | NO  |
| 0 | ENSG00000108883 | -                                                                       | -   | -  | YES | YES | NO  |
| 0 | ENSG00000108946 | -                                                                       | -   | -  | NO  | YES | YES |
| 0 | ENSG00000108953 | -                                                                       | -   | -  | YES | NO  | YES |
| 0 | ENSG00000108963 | -                                                                       | -   | -  | YES | NO  | YES |
| 0 | ENSG00000109320 | -                                                                       | -   | -  | NO  | YES | YES |

|   |                 |                                                      |     |    |     |     |     |
|---|-----------------|------------------------------------------------------|-----|----|-----|-----|-----|
| 0 | ENSG00000109339 | -                                                    | -   | -  | YES | YES | NO  |
| 0 | ENSG00000109458 | -                                                    | -   | -  | YES | YES | YES |
| 0 | ENSG00000109501 | -                                                    | -   | -  | NO  | YES | YES |
| 0 | ENSG00000109606 | -                                                    | -   | -  | YES | YES | NO  |
| 0 | ENSG00000109670 | -                                                    | -   | -  | NO  | YES | YES |
| 0 | ENSG00000109705 | -                                                    | -   | -  | NO  | YES | YES |
| 0 | ENSG00000109917 | -                                                    | -   | -  | YES | NO  | YES |
| 0 | ENSG00000110090 | CPT deficiency, hepatic, type I, 255120              | YES | NO | NO  | NO  | YES |
| 0 | ENSG00000110092 | -                                                    | -   | -  | YES | YES | YES |
| 0 | ENSG00000110107 | -                                                    | -   | -  | YES | YES | YES |
| 0 | ENSG00000110172 | -                                                    | -   | -  | YES | NO  | YES |
| 0 | ENSG00000110321 | -                                                    | -   | -  | YES | NO  | YES |
| 0 | ENSG00000110436 | -                                                    | -   | -  | NO  | YES | YES |
| 0 | ENSG00000110536 | -                                                    | -   | -  | YES | NO  | YES |
| 0 | ENSG00000110693 | -                                                    | -   | -  | NO  | YES | YES |
| 0 | ENSG00000110711 | -                                                    | -   | -  | NO  | YES | YES |
| 0 | ENSG00000110713 | -                                                    | -   | -  | NO  | YES | YES |
| 0 | ENSG00000110721 | -                                                    | -   | -  | YES | NO  | YES |
| 0 | ENSG00000111142 | -                                                    | -   | -  | NO  | YES | YES |
| 0 | ENSG00000111145 | -                                                    | -   | -  | YES | NO  | YES |
| 0 | ENSG00000111206 | -                                                    | -   | -  | YES | YES | YES |
| 0 | ENSG00000111229 | -                                                    | -   | -  | YES | NO  | YES |
| 0 | ENSG00000111276 | -                                                    | -   | -  | YES | YES | NO  |
| 0 | ENSG00000111328 | -                                                    | -   | -  | YES | NO  | YES |
| 0 | ENSG00000111361 | -                                                    | -   | -  | YES | YES | NO  |
| 0 | ENSG00000111424 | -                                                    | -   | -  | YES | YES | NO  |
| 0 | ENSG00000111640 | -                                                    | -   | -  | YES | NO  | YES |
| 0 | ENSG00000111667 | -                                                    | -   | -  | YES | NO  | YES |
| 0 | ENSG00000111799 | -                                                    | -   | -  | YES | NO  | YES |
| 0 | ENSG00000111845 | -                                                    | -   | -  | YES | YES | NO  |
| 0 | ENSG00000111880 | -                                                    | -   | -  | YES | YES | NO  |
| 0 | ENSG00000112033 | -                                                    | -   | -  | NO  | YES | YES |
| 0 | ENSG00000112081 | -                                                    | -   | -  | YES | NO  | YES |
| 0 | ENSG00000112096 | -                                                    | -   | -  | YES | YES | YES |
| 0 | ENSG00000112118 | -                                                    | -   | -  | YES | NO  | YES |
| 0 | ENSG00000112242 | -                                                    | -   | -  | YES | NO  | YES |
| 0 | ENSG00000112294 | -                                                    | -   | -  | NO  | YES | YES |
| 0 | ENSG00000112312 | -                                                    | -   | -  | YES | YES | YES |
| 0 | ENSG00000112333 | -                                                    | -   | -  | YES | YES | NO  |
| 0 | ENSG00000112357 | Rhizomelic chondrodysplasia punctata, type 1, 215100 | YES | NO | NO  | YES | YES |
| 0 | ENSG00000112531 | -                                                    | -   | -  | NO  | YES | YES |
| 0 | ENSG00000112559 | -                                                    | -   | -  | NO  | YES | YES |
| 0 | ENSG00000112578 | -                                                    | -   | -  | YES | NO  | YES |
| 0 | ENSG00000112592 | -                                                    | -   | -  | NO  | YES | YES |
| 0 | ENSG00000112640 | -                                                    | -   | -  | YES | NO  | YES |

|   |                 |                                                                               |     |     |     |     |     |
|---|-----------------|-------------------------------------------------------------------------------|-----|-----|-----|-----|-----|
| 0 | ENSG00000112658 | -                                                                             | -   | -   | YES | NO  | YES |
| 0 | ENSG00000112715 | -                                                                             | -   | -   | YES | YES | YES |
| 0 | ENSG00000113070 | -                                                                             | -   | -   | NO  | YES | YES |
| 0 | ENSG00000113083 | -                                                                             | -   | -   | NO  | YES | YES |
| 0 | ENSG00000113161 | -                                                                             | -   | -   | YES | NO  | YES |
| 0 | ENSG00000113448 | -                                                                             | -   | -   | YES | NO  | YES |
| 0 | ENSG00000113494 | -                                                                             | -   | -   | YES | YES | NO  |
| 0 | ENSG00000113522 | -                                                                             | -   | -   | YES | YES | YES |
| 0 | ENSG00000113558 | -                                                                             | -   | -   | YES | YES | NO  |
| 0 | ENSG00000113575 | -                                                                             | -   | -   | YES | NO  | YES |
| 0 | ENSG00000113578 | -                                                                             | -   | -   | YES | YES | NO  |
| 0 | ENSG00000113580 | Cortisol resistance, 138040                                                   | NO  | YES | YES | YES | YES |
| 0 | ENSG00000113643 | -                                                                             | -   | -   | YES | YES | NO  |
| 0 | ENSG00000113658 | -                                                                             | -   | -   | YES | YES | YES |
| 0 | ENSG00000113721 | -                                                                             | -   | -   | YES | YES | YES |
| 0 | ENSG00000113810 | -                                                                             | -   | -   | YES | YES | NO  |
| 0 | ENSG00000113916 | -                                                                             | -   | -   | NO  | YES | YES |
| 0 | ENSG00000114270 | -                                                                             | -   | -   | NO  | YES | YES |
| 0 | ENSG00000114346 | -                                                                             | -   | -   | YES | NO  | YES |
| 0 | ENSG00000114739 | -                                                                             | -   | -   | YES | NO  | YES |
| 0 | ENSG00000115020 | -                                                                             | -   | -   | YES | NO  | YES |
| 0 | ENSG00000115138 | -                                                                             | -   | -   | NO  | YES | YES |
| 0 | ENSG00000115170 | -                                                                             | -   | -   | YES | NO  | YES |
| 0 | ENSG00000115241 | -                                                                             | -   | -   | YES | NO  | YES |
| 0 | ENSG00000115306 | -                                                                             | -   | -   | NO  | YES | YES |
| 0 | ENSG00000115414 | -                                                                             | -   | -   | YES | YES | YES |
| 0 | ENSG00000115415 | -                                                                             | -   | -   | YES | YES | YES |
| 0 | ENSG00000115486 | Vitamin K-dependent coagulation defect, 277450                                | YES | NO  | NO  | NO  | YES |
| 0 | ENSG00000115524 | -                                                                             | -   | -   | YES | NO  | YES |
| 0 | ENSG00000115657 | -                                                                             | -   | -   | YES | YES | NO  |
| 0 | ENSG00000115718 | Thrombophilia due to protein C deficiency, 176860; neonatal purpura fulminans | YES | NO  | NO  | YES | YES |
| 0 | ENSG00000115738 | -                                                                             | -   | -   | YES | YES | YES |
| 0 | ENSG00000115758 | -                                                                             | -   | -   | NO  | YES | YES |
| 0 | ENSG00000115760 | -                                                                             | -   | -   | YES | NO  | YES |
| 0 | ENSG00000115947 | -                                                                             | -   | -   | YES | YES | NO  |
| 0 | ENSG00000115966 | -                                                                             | -   | -   | YES | NO  | YES |
| 0 | ENSG00000116014 | Hypogonadotropic hypogonadism, 146110                                         | NO  | YES | NO  | NO  | YES |
| 0 | ENSG00000116017 | -                                                                             | -   | -   | YES | NO  | YES |
| 0 | ENSG00000116030 | -                                                                             | -   | -   | YES | YES | YES |
| 0 | ENSG00000116096 | -                                                                             | -   | -   | NO  | YES | YES |
| 0 | ENSG00000116132 | -                                                                             | -   | -   | NO  | YES | YES |
| 0 | ENSG00000116133 | -                                                                             | -   | -   | NO  | YES | YES |
| 0 | ENSG00000116266 | -                                                                             | -   | -   | YES | NO  | YES |
| 0 | ENSG00000116285 | -                                                                             | -   | -   | NO  | YES | YES |

|   |                 |                                                                |     |    |     |     |     |
|---|-----------------|----------------------------------------------------------------|-----|----|-----|-----|-----|
| 0 | ENSG00000116478 | -                                                              | -   | -  | YES | YES | YES |
| 0 | ENSG00000116679 | -                                                              | -   | -  | YES | NO  | YES |
| 0 | ENSG00000116704 | -                                                              | -   | -  | YES | YES | YES |
| 0 | ENSG00000116809 | -                                                              | -   | -  | YES | NO  | YES |
| 0 | ENSG00000116833 | -                                                              | -   | -  | YES | YES | YES |
| 0 | ENSG00000116984 | -                                                              | -   | -  | NO  | YES | YES |
| 0 | ENSG00000117054 | Acyl-CoA dehydrogenase, median-chain,<br>deficiency of, 201450 | YES | NO | NO  | YES | YES |
| 0 | ENSG00000117298 | Hirschsprung disease, 142623                                   | YES | NO | NO  | YES | YES |
| 0 | ENSG00000117305 | -                                                              | -   | -  | NO  | YES | YES |
| 0 | ENSG00000117394 | -                                                              | -   | -  | NO  | YES | YES |
| 0 | ENSG00000117399 | -                                                              | -   | -  | YES | NO  | YES |
| 0 | ENSG00000117505 | -                                                              | -   | -  | YES | YES | NO  |
| 0 | ENSG00000117595 | -                                                              | -   | -  | NO  | YES | YES |
| 0 | ENSG00000117601 | -                                                              | -   | -  | NO  | YES | YES |
| 0 | ENSG00000117682 | -                                                              | -   | -  | YES | YES | NO  |
| 0 | ENSG00000117751 | -                                                              | -   | -  | YES | NO  | YES |
| 0 | ENSG00000117984 | Congenital neuronal ceroid lipofuscinosis 10,<br>610127        | YES | NO | NO  | YES | NO  |
| 0 | ENSG00000118046 | Peutz-Jeghers syndrome, 175200                                 | YES | NO | NO  | YES | YES |
| 0 | ENSG00000118260 | -                                                              | -   | -  | NO  | YES | YES |
| 0 | ENSG00000118402 | -                                                              | -   | -  | NO  | YES | YES |
| 0 | ENSG00000118513 | -                                                              | -   | -  | YES | YES | YES |
| 0 | ENSG00000118523 | -                                                              | -   | -  | YES | NO  | YES |
| 0 | ENSG00000118526 | -                                                              | -   | -  | YES | NO  | YES |
| 0 | ENSG00000118640 | -                                                              | -   | -  | NO  | YES | YES |
| 0 | ENSG00000118655 | -                                                              | -   | -  | YES | NO  | YES |
| 0 | ENSG00000118762 | -                                                              | -   | -  | NO  | YES | YES |
| 0 | ENSG00000119121 | -                                                              | -   | -  | YES | NO  | YES |
| 0 | ENSG00000119318 | -                                                              | -   | -  | YES | NO  | YES |
| 0 | ENSG00000119383 | -                                                              | -   | -  | YES | YES | NO  |
| 0 | ENSG00000119508 | -                                                              | -   | -  | YES | NO  | YES |
| 0 | ENSG00000119523 | -                                                              | -   | -  | YES | YES | NO  |
| 0 | ENSG00000119681 | -                                                              | -   | -  | YES | NO  | YES |
| 0 | ENSG00000119699 | -                                                              | -   | -  | YES | NO  | YES |
| 0 | ENSG00000119772 | -                                                              | -   | -  | NO  | YES | YES |
| 0 | ENSG00000119899 | -                                                              | -   | -  | NO  | YES | YES |
| 0 | ENSG00000120156 | -                                                              | -   | -  | YES | NO  | YES |
| 0 | ENSG00000120251 | -                                                              | -   | -  | NO  | YES | YES |
| 0 | ENSG00000120314 | -                                                              | -   | -  | YES | NO  | YES |
| 0 | ENSG00000120708 | -                                                              | -   | -  | YES | YES | NO  |
| 0 | ENSG00000120756 | -                                                              | -   | -  | YES | YES | NO  |
| 0 | ENSG00000120868 | -                                                              | -   | -  | YES | YES | YES |
| 0 | ENSG00000120885 | -                                                              | -   | -  | YES | YES | NO  |
| 0 | ENSG00000121022 | -                                                              | -   | -  | NO  | YES | YES |
| 0 | ENSG00000121691 | -                                                              | -   | -  | YES | YES | NO  |

|   |                 |                                                                      |     |    |     |     |     |
|---|-----------------|----------------------------------------------------------------------|-----|----|-----|-----|-----|
| 0 | ENSG00000121774 | -                                                                    | -   | -  | YES | NO  | YES |
| 0 | ENSG00000121858 | -                                                                    | -   | -  | YES | YES | NO  |
| 0 | ENSG00000121879 | -                                                                    | -   | -  | YES | YES | YES |
| 0 | ENSG00000121966 | -                                                                    | -   | -  | NO  | YES | YES |
| 0 | ENSG00000122025 | -                                                                    | -   | -  | YES | YES | NO  |
| 0 | ENSG00000122257 | -                                                                    | -   | -  | YES | NO  | YES |
| 0 | ENSG00000122367 | -                                                                    | -   | -  | NO  | YES | YES |
| 0 | ENSG00000122691 | -                                                                    | -   | -  | NO  | YES | YES |
| 0 | ENSG00000122756 | -                                                                    | -   | -  | NO  | YES | YES |
| 0 | ENSG00000122877 | -                                                                    | -   | -  | YES | NO  | YES |
| 0 | ENSG00000122966 | -                                                                    | -   | -  | YES | NO  | YES |
| 0 | ENSG00000123154 | -                                                                    | -   | -  | YES | YES | YES |
| 0 | ENSG00000123307 | -                                                                    | -   | -  | YES | NO  | YES |
| 0 | ENSG00000123374 | -                                                                    | -   | -  | YES | YES | YES |
| 0 | ENSG00000123405 | -                                                                    | -   | -  | NO  | YES | YES |
| 0 | ENSG00000123454 | -                                                                    | -   | -  | NO  | YES | YES |
| 0 | ENSG00000123505 | -                                                                    | -   | -  | YES | YES | YES |
| 0 | ENSG00000123560 | -                                                                    | -   | -  | NO  | YES | YES |
| 0 | ENSG00000123737 | -                                                                    | -   | -  | YES | YES | NO  |
| 0 | ENSG00000123908 | -                                                                    | -   | -  | YES | NO  | YES |
| 0 | ENSG00000124151 | -                                                                    | -   | -  | YES | NO  | YES |
| 0 | ENSG00000124205 | -                                                                    | -   | -  | NO  | YES | YES |
| 0 | ENSG00000124253 | -                                                                    | -   | -  | YES | NO  | YES |
| 0 | ENSG00000124479 | -                                                                    | -   | -  | YES | YES | NO  |
| 0 | ENSG00000124535 | -                                                                    | -   | -  | YES | YES | NO  |
| 0 | ENSG00000124615 | Molybdenum cofactor deficiency, type A,<br>252150                    | YES | NO | NO  | NO  | YES |
| 0 | ENSG00000124766 | -                                                                    | -   | -  | YES | NO  | YES |
| 0 | ENSG00000125084 | -                                                                    | -   | -  | YES | NO  | YES |
| 0 | ENSG00000125347 | -                                                                    | -   | -  | YES | YES | NO  |
| 0 | ENSG00000125398 | Campomelic dysplasia with autosomal sex<br>reversal, 114290          | YES | NO | NO  | YES | YES |
| 0 | ENSG00000125454 | Amish lethal microcephaly, 607196                                    | YES | NO | NO  | YES | YES |
| 0 | ENSG00000125630 | -                                                                    | -   | -  | YES | NO  | YES |
| 0 | ENSG00000125798 | -                                                                    | -   | -  | NO  | YES | YES |
| 0 | ENSG00000125845 | -                                                                    | -   | -  | NO  | YES | YES |
| 0 | ENSG00000125863 | Bardet-Biedl syndrome, 209900; McKusick-<br>Kaufman syndrome, 236700 | YES | NO | NO  | YES | YES |
| 0 | ENSG00000125877 | -                                                                    | -   | -  | YES | NO  | YES |
| 0 | ENSG00000125885 | -                                                                    | -   | -  | YES | YES | NO  |
| 0 | ENSG00000125952 | -                                                                    | -   | -  | YES | YES | YES |
| 0 | ENSG00000125977 | -                                                                    | -   | -  | YES | NO  | YES |
| 0 | ENSG00000126215 | -                                                                    | -   | -  | YES | YES | NO  |
| 0 | ENSG00000126216 | -                                                                    | -   | -  | YES | YES | NO  |
| 0 | ENSG00000126457 | -                                                                    | -   | -  | YES | NO  | YES |
| 0 | ENSG00000126581 | -                                                                    | -   | -  | NO  | YES | YES |

|   |                 |                                                        |     |     |     |     |     |
|---|-----------------|--------------------------------------------------------|-----|-----|-----|-----|-----|
| 0 | ENSG00000126653 | -                                                      | -   | -   | YES | NO  | YES |
| 0 | ENSG00000127528 | -                                                      | -   | -   | NO  | YES | YES |
| 0 | ENSG00000127603 | -                                                      | -   | -   | NO  | YES | YES |
| 0 | ENSG00000127616 | -                                                      | -   | -   | YES | YES | YES |
| 0 | ENSG00000127947 | -                                                      | -   | -   | YES | NO  | YES |
| 0 | ENSG00000127948 | POR deficiency, 201750; Antley-Bixler syndrome, 207410 | YES | YES | NO  | YES | YES |
| 0 | ENSG00000128052 | -                                                      | -   | -   | YES | NO  | YES |
| 0 | ENSG00000128191 | -                                                      | -   | -   | YES | NO  | YES |
| 0 | ENSG00000128683 | -                                                      | -   | -   | NO  | YES | YES |
| 0 | ENSG00000128791 | -                                                      | -   | -   | YES | NO  | YES |
| 0 | ENSG00000128829 | -                                                      | -   | -   | YES | YES | YES |
| 0 | ENSG00000128917 | -                                                      | -   | -   | NO  | YES | YES |
| 0 | ENSG00000128918 | -                                                      | -   | -   | NO  | YES | YES |
| 0 | ENSG00000129116 | -                                                      | -   | -   | NO  | YES | YES |
| 0 | ENSG00000129351 | -                                                      | -   | -   | NO  | YES | YES |
| 0 | ENSG00000129562 | -                                                      | -   | -   | NO  | YES | YES |
| 0 | ENSG00000129691 | -                                                      | -   | -   | YES | NO  | YES |
| 0 | ENSG00000129757 | -                                                      | -   | -   | YES | NO  | YES |
| 0 | ENSG00000130385 | Ovarian dysgenesis 2, 300510                           | NO  | YES | YES | NO  | NO  |
| 0 | ENSG00000130489 | -                                                      | -   | -   | YES | YES | YES |
| 0 | ENSG00000130635 | -                                                      | -   | -   | YES | NO  | YES |
| 0 | ENSG00000130669 | -                                                      | -   | -   | NO  | YES | YES |
| 0 | ENSG00000130675 | Currarino syndrome, 176450                             | YES | NO  | NO  | NO  | YES |
| 0 | ENSG00000130707 | Citrullinemia, 215700                                  | YES | NO  | NO  | NO  | YES |
| 0 | ENSG00000130714 | Walker-Warburg syndrome, 236670                        | YES | NO  | NO  | YES | YES |
| 0 | ENSG00000130726 | -                                                      | -   | -   | YES | NO  | YES |
| 0 | ENSG00000130816 | -                                                      | -   | -   | YES | YES | YES |
| 0 | ENSG00000130826 | -                                                      | -   | -   | YES | YES | NO  |
| 0 | ENSG00000131051 | -                                                      | -   | -   | YES | NO  | YES |
| 0 | ENSG00000131269 | -                                                      | -   | -   | YES | NO  | YES |
| 0 | ENSG00000131437 | -                                                      | -   | -   | NO  | YES | YES |
| 0 | ENSG00000131446 | -                                                      | -   | -   | NO  | YES | YES |
| 0 | ENSG00000131482 | -                                                      | -   | -   | YES | YES | NO  |
| 0 | ENSG00000131558 | -                                                      | -   | -   | NO  | YES | YES |
| 0 | ENSG00000131620 | -                                                      | -   | -   | YES | NO  | YES |
| 0 | ENSG00000131759 | -                                                      | -   | -   | YES | NO  | YES |
| 0 | ENSG00000131828 | Pyruvate dehydrogenase deficiency, 312170              | YES | NO  | NO  | NO  | YES |
| 0 | ENSG00000131899 | -                                                      | -   | -   | YES | YES | YES |
| 0 | ENSG00000132002 | -                                                      | -   | -   | YES | YES | NO  |
| 0 | ENSG00000132130 | -                                                      | -   | -   | NO  | YES | YES |
| 0 | ENSG00000132142 | -                                                      | -   | -   | YES | YES | YES |
| 0 | ENSG00000132155 | -                                                      | -   | -   | YES | NO  | YES |
| 0 | ENSG00000132170 | -                                                      | -   | -   | YES | YES | YES |
| 0 | ENSG00000132341 | -                                                      | -   | -   | YES | YES | NO  |
| 0 | ENSG00000132383 | -                                                      | -   | -   | NO  | YES | YES |



|   |                 |                                                                                                                                                                |     |    |     |     |     |
|---|-----------------|----------------------------------------------------------------------------------------------------------------------------------------------------------------|-----|----|-----|-----|-----|
| 0 | ENSG00000132437 | -                                                                                                                                                              | -   | -  | NO  | YES | YES |
| 0 | ENSG00000132470 | Epidermolysis bullosa, junctional, with pyloric atresia, 226730; Epidermolysis bullosa, generalized atrophic benign, 226650                                    | YES | NO | NO  | YES | YES |
| 0 | ENSG00000132639 | -                                                                                                                                                              | -   | -  | NO  | YES | YES |
| 0 | ENSG00000132646 | -                                                                                                                                                              | -   | -  | YES | YES | YES |
| 0 | ENSG00000132688 | -                                                                                                                                                              | -   | -  | NO  | YES | YES |
| 0 | ENSG00000132780 | -                                                                                                                                                              | -   | -  | YES | NO  | YES |
| 0 | ENSG00000132792 | -                                                                                                                                                              | -   | -  | YES | YES | NO  |
| 0 | ENSG00000132842 | -                                                                                                                                                              | -   | -  | YES | NO  | YES |
| 0 | ENSG00000132964 | -                                                                                                                                                              | -   | -  | YES | NO  | YES |
| 0 | ENSG00000133110 | -                                                                                                                                                              | -   | -  | NO  | YES | YES |
| 0 | ENSG00000133112 | -                                                                                                                                                              | -   | -  | YES | NO  | YES |
| 0 | ENSG00000133392 | -                                                                                                                                                              | -   | -  | NO  | YES | YES |
| 0 | ENSG00000133703 | -                                                                                                                                                              | -   | -  | YES | NO  | YES |
| 0 | ENSG00000133835 | D-bifunctional protein deficiency, 261515                                                                                                                      | YES | NO | NO  | NO  | YES |
| 0 | ENSG00000133895 | -                                                                                                                                                              | -   | -  | YES | YES | YES |
| 0 | ENSG00000133961 | -                                                                                                                                                              | -   | -  | YES | NO  | YES |
| 0 | ENSG00000134001 | -                                                                                                                                                              | -   | -  | YES | YES | YES |
| 0 | ENSG00000134057 | -                                                                                                                                                              | -   | -  | YES | YES | YES |
| 0 | ENSG00000134250 | -                                                                                                                                                              | -   | -  | NO  | YES | YES |
| 0 | ENSG00000134259 | -                                                                                                                                                              | -   | -  | NO  | YES | YES |
| 0 | ENSG00000134308 | -                                                                                                                                                              | -   | -  | YES | NO  | YES |
| 0 | ENSG00000134318 | -                                                                                                                                                              | -   | -  | YES | NO  | YES |
| 0 | ENSG00000134323 | -                                                                                                                                                              | -   | -  | NO  | YES | YES |
| 0 | ENSG00000134363 | -                                                                                                                                                              | -   | -  | NO  | YES | YES |
| 0 | ENSG00000134532 | -                                                                                                                                                              | -   | -  | YES | NO  | YES |
| 0 | ENSG00000134575 | Acid phosphatase deficiency, 200950                                                                                                                            | YES | NO | YES | NO  | NO  |
| 0 | ENSG00000134595 | -                                                                                                                                                              | -   | -  | YES | NO  | YES |
| 0 | ENSG00000134853 | -                                                                                                                                                              | -   | -  | YES | YES | YES |
| 0 | ENSG00000134899 | Xeroderma pigmentosum, group G, 278780                                                                                                                         | YES | NO | YES | NO  | YES |
| 0 | ENSG00000134910 | -                                                                                                                                                              | -   | -  | YES | YES | NO  |
| 0 | ENSG00000134954 | -                                                                                                                                                              | -   | -  | YES | NO  | YES |
| 0 | ENSG00000134982 | Gardner syndrome; Adenomatous polyposis coli; Colorectal cancer, 114500; Desmoid disease, hereditary, 135290; Medulloblastoma, 155255; Turcot syndrome, 276300 | YES | NO | YES | YES | YES |
| 0 | ENSG00000135002 | -                                                                                                                                                              | -   | -  | YES | NO  | YES |
| 0 | ENSG00000135047 | -                                                                                                                                                              | -   | -  | YES | NO  | YES |
| 0 | ENSG00000135334 | -                                                                                                                                                              | -   | -  | YES | NO  | YES |
| 0 | ENSG00000135341 | -                                                                                                                                                              | -   | -  | YES | NO  | YES |
| 0 | ENSG00000135423 | -                                                                                                                                                              | -   | -  | YES | YES | NO  |
| 0 | ENSG00000135476 | -                                                                                                                                                              | -   | -  | YES | YES | YES |
| 0 | ENSG00000135547 | -                                                                                                                                                              | -   | -  | NO  | YES | YES |
| 0 | ENSG00000135679 | -                                                                                                                                                              | -   | -  | YES | YES | YES |
| 0 | ENSG00000135766 | -                                                                                                                                                              | -   | -  | NO  | YES | YES |

|   |                 |                                                                                                                                                                                     |     |     |     |     |     |
|---|-----------------|-------------------------------------------------------------------------------------------------------------------------------------------------------------------------------------|-----|-----|-----|-----|-----|
| 0 | ENSG00000135821 | -                                                                                                                                                                                   | -   | -   | YES | YES | YES |
| 0 | ENSG00000135829 | -                                                                                                                                                                                   | -   | -   | YES | NO  | YES |
| 0 | ENSG00000135903 | -                                                                                                                                                                                   | -   | -   | NO  | YES | YES |
| 0 | ENSG00000135945 | -                                                                                                                                                                                   | -   | -   | YES | YES | YES |
| 0 | ENSG00000135960 | -                                                                                                                                                                                   | -   | -   | NO  | YES | YES |
| 0 | ENSG00000136068 | -                                                                                                                                                                                   | -   | -   | NO  | YES | YES |
| 0 | ENSG00000136160 | Hirschsprung disease-2, 600155                                                                                                                                                      | YES | NO  | NO  | YES | YES |
| 0 | ENSG00000136238 | -                                                                                                                                                                                   | -   | -   | YES | NO  | YES |
| 0 | ENSG00000136352 | -                                                                                                                                                                                   | -   | -   | NO  | YES | YES |
| 0 | ENSG00000136448 | -                                                                                                                                                                                   | -   | -   | NO  | YES | YES |
| 0 | ENSG00000136450 | -                                                                                                                                                                                   | -   | -   | YES | NO  | YES |
| 0 | ENSG00000136527 | -                                                                                                                                                                                   | -   | -   | YES | NO  | YES |
| 0 | ENSG00000136574 | -                                                                                                                                                                                   | -   | -   | NO  | YES | YES |
| 0 | ENSG00000136630 | -                                                                                                                                                                                   | -   | -   | NO  | YES | YES |
| 0 | ENSG00000136717 | -                                                                                                                                                                                   | -   | -   | YES | YES | YES |
| 0 | ENSG00000136807 | -                                                                                                                                                                                   | -   | -   | YES | YES | NO  |
| 0 | ENSG00000136811 | -                                                                                                                                                                                   | -   | -   | YES | NO  | YES |
| 0 | ENSG00000136826 | -                                                                                                                                                                                   | -   | -   | YES | NO  | YES |
| 0 | ENSG00000136868 | -                                                                                                                                                                                   | -   | -   | NO  | YES | YES |
| 0 | ENSG00000136931 | Sex reversal, XY, with adrenal failure, 184757                                                                                                                                      | NO  | YES | YES | NO  | YES |
| 0 | ENSG00000136936 | -                                                                                                                                                                                   | -   | -   | YES | YES | YES |
| 0 | ENSG00000136960 | -                                                                                                                                                                                   | -   | -   | NO  | YES | YES |
| 0 | ENSG00000136997 | -                                                                                                                                                                                   | -   | -   | YES | YES | YES |
| 0 | ENSG00000137076 | -                                                                                                                                                                                   | -   | -   | YES | NO  | YES |
| 0 | ENSG00000137193 | -                                                                                                                                                                                   | -   | -   | YES | YES | NO  |
| 0 | ENSG00000137203 | -                                                                                                                                                                                   | -   | -   | YES | NO  | YES |
| 0 | ENSG00000137273 | -                                                                                                                                                                                   | -   | -   | YES | NO  | YES |
| 0 | ENSG00000137601 | -                                                                                                                                                                                   | -   | -   | YES | NO  | YES |
| 0 | ENSG00000137710 | -                                                                                                                                                                                   | -   | -   | YES | YES | NO  |
| 0 | ENSG00000137801 | -                                                                                                                                                                                   | -   | -   | YES | NO  | YES |
| 0 | ENSG00000137807 | -                                                                                                                                                                                   | -   | -   | YES | YES | NO  |
| 0 | ENSG00000137845 | -                                                                                                                                                                                   | -   | -   | NO  | YES | YES |
| 0 | ENSG00000137869 | -                                                                                                                                                                                   | -   | -   | YES | YES | NO  |
| 0 | ENSG00000138031 | -                                                                                                                                                                                   | -   | -   | NO  | YES | YES |
| 0 | ENSG00000138039 | Pseudohermaphroditism, male, with Leydig cell hypoplasia; Hypogonadotropic hypogonadism; Micropenis; Leydig cell adenoma, with precocious puberty; Precocious puberty, male, 176410 | NO  | YES | NO  | YES | NO  |
| 0 | ENSG00000138061 | -                                                                                                                                                                                   | -   | -   | YES | YES | NO  |
| 0 | ENSG00000138083 | Holoprosencephaly-2, 157170                                                                                                                                                         | YES | NO  | NO  | NO  | YES |
| 0 | ENSG00000138160 | -                                                                                                                                                                                   | -   | -   | YES | NO  | YES |
| 0 | ENSG00000138175 | -                                                                                                                                                                                   | -   | -   | YES | NO  | YES |
| 0 | ENSG00000138376 | -                                                                                                                                                                                   | -   | -   | YES | NO  | YES |
| 0 | ENSG00000138385 | -                                                                                                                                                                                   | -   | -   | NO  | YES | YES |
| 0 | ENSG00000138435 | -                                                                                                                                                                                   | -   | -   | NO  | YES | YES |

|   |                 |                                                                                                                                          |     |     |     |     |     |
|---|-----------------|------------------------------------------------------------------------------------------------------------------------------------------|-----|-----|-----|-----|-----|
| 0 | ENSG00000138448 | -                                                                                                                                        | -   | -   | YES | NO  | YES |
| 0 | ENSG00000138449 | -                                                                                                                                        | -   | -   | NO  | YES | YES |
| 0 | ENSG00000138604 | -                                                                                                                                        | -   | -   | NO  | YES | YES |
| 0 | ENSG00000138685 | -                                                                                                                                        | -   | -   | YES | YES | NO  |
| 0 | ENSG00000138696 | Chondrodysplasia, acromesomelic, with genital anomalies, 609441                                                                          | NO  | YES | YES | NO  | NO  |
| 0 | ENSG00000138778 | -                                                                                                                                        | -   | -   | YES | NO  | YES |
| 0 | ENSG00000138798 | -                                                                                                                                        | -   | -   | YES | YES | NO  |
| 0 | ENSG00000138802 | -                                                                                                                                        | -   | -   | NO  | YES | YES |
| 0 | ENSG00000138823 | -                                                                                                                                        | -   | -   | NO  | YES | YES |
| 0 | ENSG00000139083 | -                                                                                                                                        | -   | -   | NO  | YES | YES |
| 0 | ENSG00000139174 | -                                                                                                                                        | -   | -   | YES | NO  | YES |
| 0 | ENSG00000139219 | -                                                                                                                                        | -   | -   | NO  | YES | YES |
| 0 | ENSG00000139318 | -                                                                                                                                        | -   | -   | YES | NO  | YES |
| 0 | ENSG00000139352 | -                                                                                                                                        | -   | -   | NO  | YES | YES |
| 0 | ENSG00000139514 | -                                                                                                                                        | -   | -   | YES | NO  | YES |
| 0 | ENSG00000139549 | Partial gonadal dysgenesis with minifascicular neuropathy, 607080                                                                        | NO  | YES | YES | NO  | NO  |
| 0 | ENSG00000139567 | -                                                                                                                                        | -   | -   | YES | YES | YES |
| 0 | ENSG00000139618 | -                                                                                                                                        | -   | -   | YES | YES | YES |
| 0 | ENSG00000139625 | -                                                                                                                                        | -   | -   | YES | NO  | YES |
| 0 | ENSG00000139631 | -                                                                                                                                        | -   | -   | YES | YES | NO  |
| 0 | ENSG00000139687 | -                                                                                                                                        | -   | -   | YES | YES | YES |
| 0 | ENSG00000139842 | -                                                                                                                                        | -   | -   | NO  | YES | YES |
| 0 | ENSG00000140105 | -                                                                                                                                        | -   | -   | YES | YES | NO  |
| 0 | ENSG00000140326 | -                                                                                                                                        | -   | -   | YES | YES | YES |
| 0 | ENSG00000140416 | -                                                                                                                                        | -   | -   | YES | YES | YES |
| 0 | ENSG00000140443 | -                                                                                                                                        | -   | -   | YES | NO  | YES |
| 0 | ENSG00000140521 | Alpers syndrome, 203700                                                                                                                  | YES | NO  | NO  | YES | YES |
| 0 | ENSG00000140538 | -                                                                                                                                        | -   | -   | YES | NO  | YES |
| 0 | ENSG00000140564 | -                                                                                                                                        | -   | -   | YES | YES | YES |
| 0 | ENSG00000140992 | -                                                                                                                                        | -   | -   | YES | NO  | YES |
| 0 | ENSG00000141027 | -                                                                                                                                        | -   | -   | NO  | YES | YES |
| 0 | ENSG00000141030 | -                                                                                                                                        | -   | -   | YES | NO  | YES |
| 0 | ENSG00000141378 | -                                                                                                                                        | -   | -   | YES | NO  | YES |
| 0 | ENSG00000141448 | -                                                                                                                                        | -   | -   | NO  | YES | YES |
| 0 | ENSG00000141510 | Colorectal cancer, 114500; Esophageal cancer, 133239; Lung cancer, 211980; Horoid plexus papilloma, 260500; Li-Fraumeni syndrome, 151623 | YES | NO  | YES | YES | YES |
| 0 | ENSG00000141551 | -                                                                                                                                        | -   | -   | YES | NO  | YES |
| 0 | ENSG00000141564 | -                                                                                                                                        | -   | -   | NO  | YES | YES |
| 0 | ENSG00000141646 | -                                                                                                                                        | -   | -   | YES | YES | YES |
| 0 | ENSG00000141720 | -                                                                                                                                        | -   | -   | YES | NO  | YES |
| 0 | ENSG00000141736 | -                                                                                                                                        | -   | -   | YES | YES | YES |
| 0 | ENSG00000141837 | -                                                                                                                                        | -   | -   | NO  | YES | YES |

|   |                 |                                                               |     |    |     |     |     |
|---|-----------------|---------------------------------------------------------------|-----|----|-----|-----|-----|
| 0 | ENSG00000141867 | -                                                             | -   | -  | YES | YES | YES |
| 0 | ENSG00000142168 | -                                                             | -   | -  | YES | YES | NO  |
| 0 | ENSG00000142192 | -                                                             | -   | -  | YES | YES | NO  |
| 0 | ENSG00000142208 | -                                                             | -   | -  | YES | YES | YES |
| 0 | ENSG00000142731 | -                                                             | -   | -  | YES | NO  | YES |
| 0 | ENSG00000142798 | Silverman-Handmaker type of dyssegmental<br>dysplasia, 224410 | YES | NO | NO  | YES | YES |
| 0 | ENSG00000142867 | -                                                             | -   | -  | YES | NO  | YES |
| 0 | ENSG00000142871 | -                                                             | -   | -  | YES | NO  | YES |
| 0 | ENSG00000142949 | -                                                             | -   | -  | YES | YES | NO  |
| 0 | ENSG00000143140 | -                                                             | -   | -  | YES | NO  | YES |
| 0 | ENSG00000143256 | -                                                             | -   | -  | YES | NO  | YES |
| 0 | ENSG00000143337 | -                                                             | -   | -  | YES | NO  | YES |
| 0 | ENSG00000143379 | -                                                             | -   | -  | YES | YES | YES |
| 0 | ENSG00000143384 | -                                                             | -   | -  | YES | YES | NO  |
| 0 | ENSG00000143437 | -                                                             | -   | -  | NO  | YES | YES |
| 0 | ENSG00000143476 | -                                                             | -   | -  | NO  | YES | YES |
| 0 | ENSG00000143799 | -                                                             | -   | -  | YES | YES | YES |
| 0 | ENSG00000143801 | -                                                             | -   | -  | YES | YES | NO  |
| 0 | ENSG00000143815 | -                                                             | -   | -  | NO  | YES | YES |
| 0 | ENSG00000143816 | -                                                             | -   | -  | YES | NO  | YES |
| 0 | ENSG00000143839 | -                                                             | -   | -  | NO  | YES | YES |
| 0 | ENSG00000143858 | -                                                             | -   | -  | NO  | YES | YES |
| 0 | ENSG00000143952 | -                                                             | -   | -  | YES | NO  | YES |
| 0 | ENSG00000143995 | -                                                             | -   | -  | YES | YES | YES |
| 0 | ENSG00000144028 | -                                                             | -   | -  | YES | NO  | YES |
| 0 | ENSG00000144381 | -                                                             | -   | -  | YES | YES | YES |
| 0 | ENSG00000144452 | -                                                             | -   | -  | NO  | YES | YES |
| 0 | ENSG00000144668 | -                                                             | -   | -  | NO  | YES | YES |
| 0 | ENSG00000144744 | -                                                             | -   | -  | YES | NO  | YES |
| 0 | ENSG00000145012 | -                                                             | -   | -  | NO  | YES | YES |
| 0 | ENSG00000145386 | -                                                             | -   | -  | YES | YES | YES |
| 0 | ENSG00000145604 | -                                                             | -   | -  | YES | YES | NO  |
| 0 | ENSG00000145632 | -                                                             | -   | -  | YES | NO  | YES |
| 0 | ENSG00000145681 | -                                                             | -   | -  | NO  | YES | YES |
| 0 | ENSG00000145715 | -                                                             | -   | -  | YES | NO  | YES |
| 0 | ENSG00000145730 | -                                                             | -   | -  | YES | YES | YES |
| 0 | ENSG00000145741 | -                                                             | -   | -  | YES | YES | YES |
| 0 | ENSG00000145888 | -                                                             | -   | -  | YES | NO  | YES |
| 0 | ENSG00000145907 | -                                                             | -   | -  | YES | NO  | YES |
| 0 | ENSG00000146085 | -                                                             | -   | -  | NO  | YES | YES |
| 0 | ENSG00000146247 | -                                                             | -   | -  | YES | NO  | YES |
| 0 | ENSG00000146648 | -                                                             | -   | -  | YES | YES | YES |
| 0 | ENSG00000147044 | -                                                             | -   | -  | YES | YES | YES |
| 0 | ENSG00000147099 | -                                                             | -   | -  | YES | NO  | YES |
| 0 | ENSG00000147133 | -                                                             | -   | -  | YES | YES | NO  |

|   |                 |                                                                                                                                       |     |     |     |     |     |
|---|-----------------|---------------------------------------------------------------------------------------------------------------------------------------|-----|-----|-----|-----|-----|
| 0 | ENSG00000147155 | -                                                                                                                                     | -   | -   | NO  | YES | YES |
| 0 | ENSG00000147316 | -                                                                                                                                     | -   | -   | YES | YES | YES |
| 0 | ENSG00000147465 | Lipoid adrenal hyperplasia, 201710                                                                                                    | YES | NO  | NO  | NO  | YES |
| 0 | ENSG00000147571 | Autosomal recessive hypothalamic corticotropin deficiency, 122560                                                                     | YES | NO  | YES | YES | NO  |
| 0 | ENSG00000147601 | -                                                                                                                                     | -   | -   | YES | NO  | YES |
| 0 | ENSG00000148053 | -                                                                                                                                     | -   | -   | YES | YES | YES |
| 0 | ENSG00000148154 | -                                                                                                                                     | -   | -   | NO  | YES | YES |
| 0 | ENSG00000148180 | -                                                                                                                                     | -   | -   | YES | NO  | YES |
| 0 | ENSG00000148200 | -                                                                                                                                     | -   | -   | YES | NO  | YES |
| 0 | ENSG00000148400 | -                                                                                                                                     | -   | -   | NO  | YES | YES |
| 0 | ENSG00000148408 | -                                                                                                                                     | -   | -   | NO  | YES | YES |
| 0 | ENSG00000148584 | -                                                                                                                                     | -   | -   | NO  | YES | YES |
| 0 | ENSG00000148737 | -                                                                                                                                     | -   | -   | YES | NO  | YES |
| 0 | ENSG00000148795 | -                                                                                                                                     | -   | -   | YES | NO  | YES |
| 0 | ENSG00000148926 | -                                                                                                                                     | -   | -   | NO  | YES | YES |
| 0 | ENSG00000149177 | -                                                                                                                                     | -   | -   | YES | NO  | YES |
| 0 | ENSG00000149187 | -                                                                                                                                     | -   | -   | NO  | YES | YES |
| 0 | ENSG00000149257 | -                                                                                                                                     | -   | -   | YES | NO  | YES |
| 0 | ENSG00000149311 | T-cell prolymphocytic leukemia, sporadic; Lymphoma, B-cell non-Hodgkin, somatic; Lymphoma, mantel cell; Ataxia-telangiectasia, 208900 | NO  | YES | NO  | YES | NO  |
| 0 | ENSG00000149480 | -                                                                                                                                     | -   | -   | NO  | YES | YES |
| 0 | ENSG00000149554 | -                                                                                                                                     | -   | -   | YES | YES | YES |
| 0 | ENSG00000149923 | -                                                                                                                                     | -   | -   | YES | YES | YES |
| 0 | ENSG00000149968 | -                                                                                                                                     | -   | -   | YES | YES | NO  |
| 0 | ENSG00000150093 | -                                                                                                                                     | -   | -   | NO  | YES | YES |
| 0 | ENSG00000150347 | -                                                                                                                                     | -   | -   | YES | NO  | YES |
| 0 | ENSG00000150630 | -                                                                                                                                     | -   | -   | YES | NO  | YES |
| 0 | ENSG00000150787 | -                                                                                                                                     | -   | -   | NO  | YES | YES |
| 0 | ENSG00000150907 | -                                                                                                                                     | -   | -   | YES | NO  | YES |
| 0 | ENSG00000151247 | -                                                                                                                                     | -   | -   | YES | YES | NO  |
| 0 | ENSG00000151414 | -                                                                                                                                     | -   | -   | YES | NO  | YES |
| 0 | ENSG00000151623 | -                                                                                                                                     | -   | -   | YES | YES | YES |
| 0 | ENSG00000151657 | -                                                                                                                                     | -   | -   | YES | YES | NO  |
| 0 | ENSG00000151694 | -                                                                                                                                     | -   | -   | NO  | YES | YES |
| 0 | ENSG00000151702 | -                                                                                                                                     | -   | -   | YES | NO  | YES |
| 0 | ENSG00000151892 | -                                                                                                                                     | -   | -   | NO  | YES | YES |
| 0 | ENSG00000151914 | -                                                                                                                                     | -   | -   | NO  | YES | YES |
| 0 | ENSG00000151923 | -                                                                                                                                     | -   | -   | NO  | YES | YES |
| 0 | ENSG00000152332 | -                                                                                                                                     | -   | -   | YES | YES | NO  |
| 0 | ENSG00000152661 | -                                                                                                                                     | -   | -   | YES | YES | YES |
| 0 | ENSG00000152804 | -                                                                                                                                     | -   | -   | NO  | YES | YES |
| 0 | ENSG00000152942 | -                                                                                                                                     | -   | -   | YES | NO  | YES |
| 0 | ENSG00000152944 | -                                                                                                                                     | -   | -   | YES | NO  | YES |

|   |                 |                                       |     |    |     |     |     |
|---|-----------------|---------------------------------------|-----|----|-----|-----|-----|
| 0 | ENSG00000153071 | -                                     | -   | -  | NO  | YES | YES |
| 0 | ENSG00000153147 | -                                     | -   | -  | YES | NO  | YES |
| 0 | ENSG00000153162 | -                                     | -   | -  | YES | YES | NO  |
| 0 | ENSG00000153187 | -                                     | -   | -  | YES | NO  | YES |
| 0 | ENSG00000153250 | -                                     | -   | -  | YES | NO  | YES |
| 0 | ENSG00000153879 | -                                     | -   | -  | YES | NO  | YES |
| 0 | ENSG00000153904 | -                                     | -   | -  | NO  | YES | YES |
| 0 | ENSG00000153944 | -                                     | -   | -  | YES | NO  | YES |
| 0 | ENSG00000154188 | -                                     | -   | -  | NO  | YES | YES |
| 0 | ENSG00000154229 | -                                     | -   | -  | YES | YES | NO  |
| 0 | ENSG00000154473 | -                                     | -   | -  | YES | YES | YES |
| 0 | ENSG00000154727 | -                                     | -   | -  | YES | NO  | YES |
| 0 | ENSG00000154767 | -                                     | -   | -  | YES | YES | NO  |
| 0 | ENSG00000155130 | -                                     | -   | -  | YES | YES | YES |
| 0 | ENSG00000155657 | -                                     | -   | -  | YES | YES | YES |
| 0 | ENSG00000155980 | -                                     | -   | -  | YES | NO  | YES |
| 0 | ENSG00000156110 | -                                     | -   | -  | YES | YES | YES |
| 0 | ENSG00000156427 | -                                     | -   | -  | YES | NO  | YES |
| 0 | ENSG00000156502 | -                                     | -   | -  | NO  | YES | YES |
| 0 | ENSG00000156709 | -                                     | -   | -  | NO  | YES | YES |
| 0 | ENSG00000156925 | Heterotaxy, X-linked visceral, 306955 | YES | NO | NO  | NO  | YES |
| 0 | ENSG00000156970 | -                                     | -   | -  | YES | NO  | YES |
| 0 | ENSG00000157005 | -                                     | -   | -  | YES | YES | NO  |
| 0 | ENSG00000157036 | -                                     | -   | -  | YES | YES | NO  |
| 0 | ENSG00000157106 | -                                     | -   | -  | YES | YES | NO  |
| 0 | ENSG00000157168 | -                                     | -   | -  | YES | NO  | YES |
| 0 | ENSG00000157216 | -                                     | -   | -  | NO  | YES | YES |
| 0 | ENSG00000157227 | -                                     | -   | -  | YES | NO  | YES |
| 0 | ENSG00000157404 | -                                     | -   | -  | YES | NO  | YES |
| 0 | ENSG00000157450 | -                                     | -   | -  | NO  | YES | YES |
| 0 | ENSG00000157456 | -                                     | -   | -  | YES | NO  | YES |
| 0 | ENSG00000157540 | -                                     | -   | -  | YES | YES | YES |
| 0 | ENSG00000157601 | -                                     | -   | -  | YES | YES | NO  |
| 0 | ENSG00000157764 | -                                     | -   | -  | YES | NO  | YES |
| 0 | ENSG00000157766 | -                                     | -   | -  | YES | YES | YES |
| 0 | ENSG00000158125 | -                                     | -   | -  | NO  | YES | YES |
| 0 | ENSG00000158195 | -                                     | -   | -  | YES | YES | YES |
| 0 | ENSG00000158290 | -                                     | -   | -  | YES | YES | NO  |
| 0 | ENSG00000158615 | -                                     | -   | -  | YES | NO  | YES |
| 0 | ENSG00000158813 | -                                     | -   | -  | NO  | YES | YES |
| 0 | ENSG00000158828 | -                                     | -   | -  | YES | YES | NO  |
| 0 | ENSG00000158955 | -                                     | -   | -  | NO  | YES | YES |
| 0 | ENSG00000159164 | -                                     | -   | -  | NO  | YES | YES |
| 0 | ENSG00000159216 | -                                     | -   | -  | YES | YES | YES |
| 0 | ENSG00000159307 | -                                     | -   | -  | YES | NO  | YES |
| 0 | ENSG00000159352 | -                                     | -   | -  | YES | NO  | YES |

|   |                 |                                                                                                          |     |    |     |     |     |
|---|-----------------|----------------------------------------------------------------------------------------------------------|-----|----|-----|-----|-----|
| 0 | ENSG00000159459 | Johanson-Blizzard syndrome, 243800                                                                       | YES | NO | NO  | YES | NO  |
| 0 | ENSG00000159640 | -                                                                                                        | -   | -  | NO  | YES | YES |
| 0 | ENSG00000159720 | -                                                                                                        | -   | -  | YES | NO  | YES |
| 0 | ENSG00000159723 | -                                                                                                        | -   | -  | NO  | YES | YES |
| 0 | ENSG00000159921 | -                                                                                                        | -   | -  | YES | NO  | YES |
| 0 | ENSG00000160145 | -                                                                                                        | -   | -  | YES | YES | NO  |
| 0 | ENSG00000160199 | -                                                                                                        | -   | -  | NO  | YES | YES |
| 0 | ENSG00000160200 | -                                                                                                        | -   | -  | NO  | YES | YES |
| 0 | ENSG00000160211 | -                                                                                                        | -   | -  | NO  | YES | YES |
| 0 | ENSG00000160285 | -                                                                                                        | -   | -  | YES | YES | NO  |
| 0 | ENSG00000160294 | -                                                                                                        | -   | -  | YES | NO  | YES |
| 0 | ENSG00000160307 | -                                                                                                        | -   | -  | YES | YES | NO  |
| 0 | ENSG00000160323 | Atypical hemolytic uremic syndrome, 235400;<br>Congenital thrombotic thrombocytopenic<br>purpura, 274150 | YES | NO | NO  | YES | NO  |
| 0 | ENSG00000160691 | -                                                                                                        | -   | -  | YES | YES | YES |
| 0 | ENSG00000160710 | -                                                                                                        | -   | -  | NO  | YES | YES |
| 0 | ENSG00000160801 | -                                                                                                        | -   | -  | NO  | YES | YES |
| 0 | ENSG00000160973 | -                                                                                                        | -   | -  | YES | NO  | YES |
| 0 | ENSG00000161021 | Leukotriene C4 synthase deficiency, 246530                                                               | YES | NO | NO  | NO  | YES |
| 0 | ENSG00000161203 | -                                                                                                        | -   | -  | YES | NO  | YES |
| 0 | ENSG00000162063 | -                                                                                                        | -   | -  | YES | NO  | YES |
| 0 | ENSG00000162298 | -                                                                                                        | -   | -  | YES | YES | YES |
| 0 | ENSG00000162407 | -                                                                                                        | -   | -  | YES | NO  | YES |
| 0 | ENSG00000162409 | -                                                                                                        | -   | -  | YES | YES | NO  |
| 0 | ENSG00000162434 | -                                                                                                        | -   | -  | YES | NO  | YES |
| 0 | ENSG00000162551 | -                                                                                                        | -   | -  | NO  | YES | YES |
| 0 | ENSG00000162607 | -                                                                                                        | -   | -  | YES | NO  | YES |
| 0 | ENSG00000162736 | -                                                                                                        | -   | -  | NO  | YES | YES |
| 0 | ENSG00000162775 | -                                                                                                        | -   | -  | NO  | YES | YES |
| 0 | ENSG00000162909 | -                                                                                                        | -   | -  | NO  | YES | YES |
| 0 | ENSG00000162992 | -                                                                                                        | -   | -  | YES | YES | YES |
| 0 | ENSG00000163064 | -                                                                                                        | -   | -  | NO  | YES | YES |
| 0 | ENSG00000163161 | -                                                                                                        | -   | -  | YES | YES | YES |
| 0 | ENSG00000163217 | -                                                                                                        | -   | -  | YES | NO  | YES |
| 0 | ENSG00000163251 | -                                                                                                        | -   | -  | YES | NO  | YES |
| 0 | ENSG00000163347 | -                                                                                                        | -   | -  | YES | NO  | YES |
| 0 | ENSG00000163348 | -                                                                                                        | -   | -  | YES | NO  | YES |
| 0 | ENSG00000163435 | -                                                                                                        | -   | -  | YES | NO  | YES |
| 0 | ENSG00000163482 | -                                                                                                        | -   | -  | NO  | YES | YES |
| 0 | ENSG00000163485 | -                                                                                                        | -   | -  | YES | YES | NO  |
| 0 | ENSG00000163501 | -                                                                                                        | -   | -  | NO  | YES | YES |
| 0 | ENSG00000163513 | -                                                                                                        | -   | -  | YES | YES | YES |
| 0 | ENSG00000163558 | -                                                                                                        | -   | -  | YES | NO  | YES |
| 0 | ENSG00000163629 | -                                                                                                        | -   | -  | YES | YES | NO  |
| 0 | ENSG00000163785 | -                                                                                                        | -   | -  | YES | NO  | YES |

|   |                 |                                                                                                                                                                |     |    |     |     |     |
|---|-----------------|----------------------------------------------------------------------------------------------------------------------------------------------------------------|-----|----|-----|-----|-----|
| 0 | ENSG00000163931 | -                                                                                                                                                              | -   | -  | NO  | YES | YES |
| 0 | ENSG00000163939 | -                                                                                                                                                              | -   | -  | YES | NO  | YES |
| 0 | ENSG00000164066 | -                                                                                                                                                              | -   | -  | NO  | YES | YES |
| 0 | ENSG00000164107 | -                                                                                                                                                              | -   | -  | NO  | YES | YES |
| 0 | ENSG00000164109 | -                                                                                                                                                              | -   | -  | YES | NO  | YES |
| 0 | ENSG00000164305 | -                                                                                                                                                              | -   | -  | YES | YES | YES |
| 0 | ENSG00000164327 | -                                                                                                                                                              | -   | -  | YES | YES | YES |
| 0 | ENSG00000164442 | -                                                                                                                                                              | -   | -  | NO  | YES | YES |
| 0 | ENSG00000164506 | -                                                                                                                                                              | -   | -  | NO  | YES | YES |
| 0 | ENSG00000164690 | -                                                                                                                                                              | -   | -  | NO  | YES | YES |
| 0 | ENSG00000164733 | -                                                                                                                                                              | -   | -  | YES | YES | NO  |
| 0 | ENSG00000164751 | -                                                                                                                                                              | -   | -  | NO  | YES | YES |
| 0 | ENSG00000164754 | -                                                                                                                                                              | -   | -  | YES | YES | YES |
| 0 | ENSG00000164761 | -                                                                                                                                                              | -   | -  | NO  | YES | YES |
| 0 | ENSG00000164953 | -                                                                                                                                                              | -   | -  | NO  | YES | YES |
| 0 | ENSG00000164985 | -                                                                                                                                                              | -   | -  | YES | NO  | YES |
| 0 | ENSG00000165025 | -                                                                                                                                                              | -   | -  | YES | NO  | YES |
| 0 | ENSG00000165060 | -                                                                                                                                                              | -   | -  | YES | YES | YES |
| 0 | ENSG00000165195 | -                                                                                                                                                              | -   | -  | NO  | YES | YES |
| 0 | ENSG00000165240 | -                                                                                                                                                              | -   | -  | NO  | YES | YES |
| 0 | ENSG00000165271 | -                                                                                                                                                              | -   | -  | YES | YES | NO  |
| 0 | ENSG00000165280 | -                                                                                                                                                              | -   | -  | YES | NO  | YES |
| 0 | ENSG00000165392 | -                                                                                                                                                              | -   | -  | NO  | YES | YES |
| 0 | ENSG00000165458 | -                                                                                                                                                              | -   | -  | YES | YES | YES |
| 0 | ENSG00000165462 | -                                                                                                                                                              | -   | -  | NO  | YES | YES |
| 0 | ENSG00000165474 | -                                                                                                                                                              | -   | -  | YES | YES | YES |
| 0 | ENSG00000165494 | -                                                                                                                                                              | -   | -  | YES | YES | NO  |
| 0 | ENSG00000165556 | -                                                                                                                                                              | -   | -  | NO  | YES | YES |
| 0 | ENSG00000165588 | -                                                                                                                                                              | -   | -  | NO  | YES | YES |
| 0 | ENSG00000165699 | -                                                                                                                                                              | -   | -  | NO  | YES | YES |
| 0 | ENSG00000165702 | -                                                                                                                                                              | -   | -  | YES | YES | YES |
| 0 | ENSG00000165704 | -                                                                                                                                                              | -   | -  | YES | YES | NO  |
| 0 | ENSG00000165731 | Multiple endocrine neoplasia IIA, 171400;<br>Medullary thyroid carcinoma, 155240; Multiple<br>endocrine neoplasia IIB, 162300; Hirschsprung<br>disease, 142623 | YES | NO | NO  | NO  | YES |
| 0 | ENSG00000165916 | -                                                                                                                                                              | -   | -  | YES | NO  | YES |
| 0 | ENSG00000165917 | -                                                                                                                                                              | -   | -  | NO  | YES | YES |
| 0 | ENSG00000165970 | -                                                                                                                                                              | -   | -  | NO  | YES | YES |
| 0 | ENSG00000165973 | -                                                                                                                                                              | -   | -  | NO  | YES | YES |
| 0 | ENSG00000166147 | -                                                                                                                                                              | -   | -  | NO  | YES | YES |
| 0 | ENSG00000166169 | -                                                                                                                                                              | -   | -  | YES | YES | YES |
| 0 | ENSG00000166200 | -                                                                                                                                                              | -   | -  | NO  | YES | YES |
| 0 | ENSG00000166311 | Niemann-Pick disease, type A, 257200;<br>Niemann-Pick disease, type B, 607616                                                                                  | YES | NO | NO  | YES | NO  |
| 0 | ENSG00000166333 | -                                                                                                                                                              | -   | -  | YES | YES | YES |



|   |                 |                                                                                                                                                                                                                               |     |     |     |     |     |
|---|-----------------|-------------------------------------------------------------------------------------------------------------------------------------------------------------------------------------------------------------------------------|-----|-----|-----|-----|-----|
| 0 | ENSG00000166337 | -                                                                                                                                                                                                                             | -   | -   | YES | NO  | YES |
| 0 | ENSG00000166340 | -                                                                                                                                                                                                                             | -   | -   | NO  | YES | YES |
| 0 | ENSG00000166441 | -                                                                                                                                                                                                                             | -   | -   | YES | NO  | YES |
| 0 | ENSG00000166454 | -                                                                                                                                                                                                                             | -   | -   | YES | NO  | YES |
| 0 | ENSG00000166483 | -                                                                                                                                                                                                                             | -   | -   | YES | YES | YES |
| 0 | ENSG00000166484 | -                                                                                                                                                                                                                             | -   | -   | YES | YES | YES |
| 0 | ENSG00000166501 | -                                                                                                                                                                                                                             | -   | -   | YES | YES | NO  |
| 0 | ENSG00000166508 | -                                                                                                                                                                                                                             | -   | -   | YES | NO  | YES |
| 0 | ENSG00000166598 | -                                                                                                                                                                                                                             | -   | -   | YES | NO  | YES |
| 0 | ENSG00000166813 | -                                                                                                                                                                                                                             | -   | -   | YES | NO  | YES |
| 0 | ENSG00000166851 | -                                                                                                                                                                                                                             | -   | -   | YES | YES | YES |
| 0 | ENSG00000166949 | -                                                                                                                                                                                                                             | -   | -   | YES | YES | NO  |
| 0 | ENSG00000167004 | -                                                                                                                                                                                                                             | -   | -   | NO  | YES | YES |
| 0 | ENSG00000167085 | -                                                                                                                                                                                                                             | -   | -   | YES | NO  | YES |
| 0 | ENSG00000167114 | -                                                                                                                                                                                                                             | -   | -   | NO  | YES | YES |
| 0 | ENSG00000167136 | -                                                                                                                                                                                                                             | -   | -   | YES | YES | YES |
| 0 | ENSG00000167182 | -                                                                                                                                                                                                                             | -   | -   | YES | NO  | YES |
| 0 | ENSG00000167193 | -                                                                                                                                                                                                                             | -   | -   | YES | NO  | YES |
| 0 | ENSG00000167244 | -                                                                                                                                                                                                                             | -   | -   | YES | YES | YES |
| 0 | ENSG00000167461 | -                                                                                                                                                                                                                             | -   | -   | YES | YES | NO  |
| 0 | ENSG00000167468 | -                                                                                                                                                                                                                             | -   | -   | NO  | YES | YES |
| 0 | ENSG00000167491 | -                                                                                                                                                                                                                             | -   | -   | NO  | YES | YES |
| 0 | ENSG00000167658 | -                                                                                                                                                                                                                             | -   | -   | YES | YES | NO  |
| 0 | ENSG00000167670 | -                                                                                                                                                                                                                             | -   | -   | YES | NO  | YES |
| 0 | ENSG00000167972 | -                                                                                                                                                                                                                             | -   | -   | NO  | YES | YES |
| 0 | ENSG00000167986 | -                                                                                                                                                                                                                             | -   | -   | NO  | YES | YES |
| 0 | ENSG00000168003 | -                                                                                                                                                                                                                             | -   | -   | YES | NO  | YES |
| 0 | ENSG00000168036 | -                                                                                                                                                                                                                             | -   | -   | YES | YES | YES |
| 0 | ENSG00000168090 | -                                                                                                                                                                                                                             | -   | -   | YES | NO  | YES |
| 0 | ENSG00000168282 | Carbohydrate-deficient glycoprotein syndrome, type II, 212066                                                                                                                                                                 | YES | NO  | NO  | NO  | YES |
| 0 | ENSG00000168283 | -                                                                                                                                                                                                                             | -   | -   | YES | NO  | YES |
| 0 | ENSG00000168348 | -                                                                                                                                                                                                                             | -   | -   | YES | YES | NO  |
| 0 | ENSG00000168610 | -                                                                                                                                                                                                                             | -   | -   | YES | YES | YES |
| 0 | ENSG00000168621 | -                                                                                                                                                                                                                             | -   | -   | YES | NO  | YES |
| 0 | ENSG00000169032 | -                                                                                                                                                                                                                             | -   | -   | YES | YES | YES |
| 0 | ENSG00000169047 | -                                                                                                                                                                                                                             | -   | -   | YES | NO  | YES |
| 0 | ENSG00000169071 | -                                                                                                                                                                                                                             | -   | -   | YES | NO  | YES |
| 0 | ENSG00000169083 | Prostate cancer; Perineal hypospadias; Androgen insensitivity, several forms, 300068; Infertile male syndrome, 308370; Spinal and bulbar muscular atrophy of Kennedy, 313200; Breast cancer, male, with Reifenstein syndrome, | NO  | YES | NO  | YES | NO  |

|   |                 | 312300                                                                                                                                                                                                                               |     |     |     |     |     |
|---|-----------------|--------------------------------------------------------------------------------------------------------------------------------------------------------------------------------------------------------------------------------------|-----|-----|-----|-----|-----|
|   |                 | Adrenal hypoplasia, congenital, with hypogonadotropic hypogonadism, 300200; Dosage-sensitive sex reversal, 300018                                                                                                                    |     |     |     |     |     |
| 0 | ENSG00000169297 |                                                                                                                                                                                                                                      | NO  | YES | YES | YES | NO  |
| 0 | ENSG00000169398 | -                                                                                                                                                                                                                                    | -   | -   | YES | YES | YES |
| 0 | ENSG00000169410 | -                                                                                                                                                                                                                                    | -   | -   | YES | NO  | YES |
| 0 | ENSG00000169679 | -                                                                                                                                                                                                                                    | -   | -   | YES | NO  | YES |
| 0 | ENSG00000169710 | -                                                                                                                                                                                                                                    | -   | -   | YES | NO  | YES |
| 0 | ENSG00000169756 | -                                                                                                                                                                                                                                    | -   | -   | YES | NO  | YES |
| 0 | ENSG00000169884 | -                                                                                                                                                                                                                                    | -   | -   | YES | YES | NO  |
| 0 | ENSG00000169919 | -                                                                                                                                                                                                                                    | -   | -   | YES | YES | YES |
| 0 | ENSG00000169946 | -                                                                                                                                                                                                                                    | -   | -   | NO  | YES | YES |
| 0 | ENSG00000170312 | -                                                                                                                                                                                                                                    | -   | -   | NO  | YES | YES |
| 0 | ENSG00000170345 | -                                                                                                                                                                                                                                    | -   | -   | YES | YES | YES |
| 0 | ENSG00000170365 | -                                                                                                                                                                                                                                    | -   | -   | NO  | YES | YES |
| 0 | ENSG00000170385 | -                                                                                                                                                                                                                                    | -   | -   | NO  | YES | YES |
| 0 | ENSG00000170421 | -                                                                                                                                                                                                                                    | -   | -   | NO  | YES | YES |
| 0 | ENSG00000170558 | -                                                                                                                                                                                                                                    | -   | -   | YES | YES | YES |
| 0 | ENSG00000170820 | Ovarian dysgenesis, hypergonadotropic, with normal karyotype, 233300                                                                                                                                                                 | NO  | YES | NO  | NO  | YES |
| 0 | ENSG00000170836 | -                                                                                                                                                                                                                                    | -   | -   | YES | NO  | YES |
| 0 | ENSG00000170927 | -                                                                                                                                                                                                                                    | -   | -   | NO  | YES | YES |
| 0 | ENSG00000170961 | -                                                                                                                                                                                                                                    | -   | -   | NO  | YES | YES |
| 0 | ENSG00000170989 | -                                                                                                                                                                                                                                    | -   | -   | YES | YES | YES |
| 0 | ENSG00000171100 | Myotubular myopathy 1, 310400                                                                                                                                                                                                        | YES | NO  | NO  | YES | YES |
| 0 | ENSG00000171105 | Leprechaunism, 246200; Noninsulin-dependent diabetes mellitus, 125853; Rabson-Mendenhall syndrome, 262190; Diabetes mellitus, insulin-resistant, with acanthosis nigricans, 610549; Familial hyperinsulinemic hypoglycemia-5, 609968 | YES | NO  | NO  | YES | YES |
| 0 | ENSG00000171298 | Glycogen storage disease II, 232300                                                                                                                                                                                                  | YES | NO  | NO  | YES | NO  |
| 0 | ENSG00000171316 | -                                                                                                                                                                                                                                    | -   | -   | NO  | YES | YES |
| 0 | ENSG00000171345 | -                                                                                                                                                                                                                                    | -   | -   | YES | NO  | YES |
| 0 | ENSG00000171522 | -                                                                                                                                                                                                                                    | -   | -   | NO  | YES | YES |
| 0 | ENSG00000171552 | -                                                                                                                                                                                                                                    | -   | -   | YES | YES | YES |
| 0 | ENSG00000171587 | -                                                                                                                                                                                                                                    | -   | -   | YES | NO  | YES |
| 0 | ENSG00000171720 | -                                                                                                                                                                                                                                    | -   | -   | YES | YES | YES |
| 0 | ENSG00000171723 | Molybdenum cofactor deficiency, 252150                                                                                                                                                                                               | YES | NO  | NO  | NO  | YES |
| 0 | ENSG00000171791 | -                                                                                                                                                                                                                                    | -   | -   | YES | YES | YES |
| 0 | ENSG00000171862 | -                                                                                                                                                                                                                                    | -   | -   | YES | YES | YES |
| 0 | ENSG00000171956 | -                                                                                                                                                                                                                                    | -   | -   | YES | NO  | YES |
| 0 | ENSG00000172071 | Wolcott-Rallison syndrome, 226980                                                                                                                                                                                                    | YES | NO  | NO  | NO  | YES |
| 0 | ENSG00000172270 | -                                                                                                                                                                                                                                    | -   | -   | NO  | YES | YES |
| 0 | ENSG00000172273 | -                                                                                                                                                                                                                                    | -   | -   | YES | NO  | YES |
| 0 | ENSG00000172482 | Hyperoxaluria, primary, type 1, 259900                                                                                                                                                                                               | YES | NO  | NO  | YES | NO  |

|   |                 |                                                                                            |     |    |     |     |     |
|---|-----------------|--------------------------------------------------------------------------------------------|-----|----|-----|-----|-----|
| 0 | ENSG00000172638 | -                                                                                          | -   | -  | NO  | YES | YES |
| 0 | ENSG00000172732 | -                                                                                          | -   | -  | NO  | YES | YES |
| 0 | ENSG00000172809 | -                                                                                          | -   | -  | YES | NO  | YES |
| 0 | ENSG00000172893 | Smith-Lemli-Opitz syndrome, type I, 270400;<br>Smith-Lemli-Opitz syndrome, type II, 268670 | YES | NO | NO  | YES | YES |
| 0 | ENSG00000172939 | -                                                                                          | -   | -  | YES | NO  | YES |
| 0 | ENSG00000172977 | -                                                                                          | -   | -  | NO  | YES | YES |
| 0 | ENSG00000173020 | -                                                                                          | -   | -  | YES | NO  | YES |
| 0 | ENSG00000173039 | -                                                                                          | -   | -  | NO  | YES | YES |
| 0 | ENSG00000173402 | -                                                                                          | -   | -  | NO  | YES | YES |
| 0 | ENSG00000173653 | -                                                                                          | -   | -  | NO  | YES | YES |
| 0 | ENSG00000173801 | -                                                                                          | -   | -  | YES | NO  | YES |
| 0 | ENSG00000173812 | -                                                                                          | -   | -  | YES | YES | NO  |
| 0 | ENSG00000174238 | -                                                                                          | -   | -  | YES | NO  | YES |
| 0 | ENSG00000174405 | -                                                                                          | -   | -  | NO  | YES | YES |
| 0 | ENSG00000174437 | -                                                                                          | -   | -  | YES | NO  | YES |
| 0 | ENSG00000175054 | -                                                                                          | -   | -  | NO  | YES | YES |
| 0 | ENSG00000175104 | -                                                                                          | -   | -  | NO  | YES | YES |
| 0 | ENSG00000175198 | Propionic acidemia, type I or pccA type,<br>606054                                         | YES | NO | NO  | YES | YES |
| 0 | ENSG00000175305 | -                                                                                          | -   | -  | YES | YES | NO  |
| 0 | ENSG00000175354 | -                                                                                          | -   | -  | YES | YES | NO  |
| 0 | ENSG00000175387 | -                                                                                          | -   | -  | YES | YES | YES |
| 0 | ENSG00000175445 | -                                                                                          | -   | -  | NO  | YES | YES |
| 0 | ENSG00000175592 | -                                                                                          | -   | -  | YES | NO  | YES |
| 0 | ENSG00000175595 | -                                                                                          | -   | -  | YES | NO  | YES |
| 0 | ENSG00000175745 | -                                                                                          | -   | -  | YES | NO  | YES |
| 0 | ENSG00000175920 | -                                                                                          | -   | -  | NO  | YES | YES |
| 0 | ENSG00000176165 | -                                                                                          | -   | -  | NO  | YES | YES |
| 0 | ENSG00000176208 | -                                                                                          | -   | -  | NO  | YES | YES |
| 0 | ENSG00000176225 | -                                                                                          | -   | -  | YES | NO  | YES |
| 0 | ENSG00000176248 | -                                                                                          | -   | -  | YES | NO  | YES |
| 0 | ENSG00000176619 | -                                                                                          | -   | -  | YES | NO  | YES |
| 0 | ENSG00000176697 | -                                                                                          | -   | -  | NO  | YES | YES |
| 0 | ENSG00000176890 | -                                                                                          | -   | -  | YES | YES | NO  |
| 0 | ENSG00000177302 | -                                                                                          | -   | -  | NO  | YES | YES |
| 0 | ENSG00000177426 | Holoprosencephaly-4, 142946                                                                | YES | NO | NO  | NO  | YES |
| 0 | ENSG00000177463 | -                                                                                          | -   | -  | YES | NO  | YES |
| 0 | ENSG00000177606 | -                                                                                          | -   | -  | YES | YES | YES |
| 0 | ENSG00000177731 | -                                                                                          | -   | -  | NO  | YES | YES |
| 0 | ENSG00000177885 | -                                                                                          | -   | -  | YES | NO  | YES |
| 0 | ENSG00000178028 | -                                                                                          | -   | -  | YES | NO  | YES |
| 0 | ENSG00000178209 | -                                                                                          | -   | -  | NO  | YES | YES |
| 0 | ENSG00000178537 | -                                                                                          | -   | -  | YES | YES | NO  |
| 0 | ENSG00000178568 | -                                                                                          | -   | -  | YES | NO  | YES |
| 0 | ENSG00000178585 | -                                                                                          | -   | -  | YES | NO  | YES |

|   |                 |                                                                       |     |     |     |     |     |
|---|-----------------|-----------------------------------------------------------------------|-----|-----|-----|-----|-----|
| 0 | ENSG00000178607 | -                                                                     | -   | -   | YES | YES | YES |
| 0 | ENSG00000178691 | -                                                                     | -   | -   | YES | NO  | YES |
| 0 | ENSG00000178726 | -                                                                     | -   | -   | NO  | YES | YES |
| 0 | ENSG00000178802 | Carbohydrate-deficient glycoprotein syndrome,<br>type Ib, 602579      | YES | NO  | NO  | NO  | YES |
| 0 | ENSG00000178951 | -                                                                     | -   | -   | NO  | YES | YES |
| 0 | ENSG00000178966 | -                                                                     | -   | -   | YES | NO  | YES |
| 0 | ENSG00000178999 | -                                                                     | -   | -   | YES | YES | YES |
| 0 | ENSG00000179218 | -                                                                     | -   | -   | NO  | YES | YES |
| 0 | ENSG00000179295 | -                                                                     | -   | -   | YES | NO  | YES |
| 0 | ENSG00000179348 | -                                                                     | -   | -   | NO  | YES | YES |
| 0 | ENSG00000180176 | -                                                                     | -   | -   | NO  | YES | YES |
| 0 | ENSG00000180209 | -                                                                     | -   | -   | YES | NO  | YES |
| 0 | ENSG00000180210 | -                                                                     | -   | -   | NO  | YES | YES |
| 0 | ENSG00000180370 | -                                                                     | -   | -   | YES | YES | YES |
| 0 | ENSG00000180447 | -                                                                     | -   | -   | YES | NO  | YES |
| 0 | ENSG00000180900 | -                                                                     | -   | -   | NO  | YES | YES |
| 0 | ENSG00000181027 | -                                                                     | -   | -   | NO  | YES | YES |
| 0 | ENSG00000181090 | -                                                                     | -   | -   | YES | NO  | YES |
| 0 | ENSG00000181104 | -                                                                     | -   | -   | YES | NO  | YES |
| 0 | ENSG00000181222 | -                                                                     | -   | -   | YES | NO  | YES |
| 0 | ENSG00000181915 | -                                                                     | -   | -   | YES | YES | NO  |
| 0 | ENSG00000181965 | -                                                                     | -   | -   | YES | NO  | YES |
| 0 | ENSG00000182263 | -                                                                     | -   | -   | YES | NO  | YES |
| 0 | ENSG00000182511 | -                                                                     | -   | -   | YES | YES | YES |
| 0 | ENSG00000182578 | -                                                                     | -   | -   | YES | NO  | YES |
| 0 | ENSG00000182621 | -                                                                     | -   | -   | YES | NO  | YES |
| 0 | ENSG00000182742 | -                                                                     | -   | -   | YES | NO  | YES |
| 0 | ENSG00000182963 | -                                                                     | -   | -   | NO  | YES | YES |
| 0 | ENSG00000183023 | -                                                                     | -   | -   | YES | YES | YES |
| 0 | ENSG00000183072 | -                                                                     | -   | -   | NO  | YES | YES |
| 0 | ENSG00000183337 | -                                                                     | -   | -   | NO  | YES | YES |
| 0 | ENSG00000183495 | -                                                                     | -   | -   | YES | NO  | YES |
| 0 | ENSG00000183691 | -                                                                     | -   | -   | YES | NO  | YES |
| 0 | ENSG00000183735 | -                                                                     | -   | -   | YES | NO  | YES |
| 0 | ENSG00000183770 | Blepharophimosis, ptosis, and epicanthus<br>inversus syndrome, 110100 | NO  | YES | NO  | NO  | YES |
| 0 | ENSG00000183853 | -                                                                     | -   | -   | NO  | YES | YES |
| 0 | ENSG00000183873 | -                                                                     | -   | -   | NO  | YES | YES |
| 0 | ENSG00000184058 | -                                                                     | -   | -   | NO  | YES | YES |
| 0 | ENSG00000184304 | -                                                                     | -   | -   | YES | YES | YES |
| 0 | ENSG00000184349 | -                                                                     | -   | -   | YES | NO  | YES |
| 0 | ENSG00000184432 | -                                                                     | -   | -   | YES | YES | NO  |
| 0 | ENSG00000184470 | -                                                                     | -   | -   | NO  | YES | YES |
| 0 | ENSG00000184557 | -                                                                     | -   | -   | YES | YES | YES |
| 0 | ENSG00000184916 | -                                                                     | -   | -   | YES | NO  | YES |

|   |                 |                                                                |     |     |     |     |     |
|---|-----------------|----------------------------------------------------------------|-----|-----|-----|-----|-----|
| 0 | ENSG00000184937 | Frasier syndrome, 136680; Denys-Drash syndrome, 194080         | NO  | YES | YES | YES | YES |
| 0 | ENSG00000185010 | Hemophilia A, 134500                                           | YES | NO  | YES | YES | NO  |
| 0 | ENSG00000185122 | -                                                              | -   | -   | NO  | YES | YES |
| 0 | ENSG00000185338 | -                                                              | -   | -   | NO  | YES | YES |
| 0 | ENSG00000185532 | -                                                              | -   | -   | YES | NO  | YES |
| 0 | ENSG00000185559 | -                                                              | -   | -   | NO  | YES | YES |
| 0 | ENSG00000185650 | -                                                              | -   | -   | YES | NO  | YES |
| 0 | ENSG00000185787 | -                                                              | -   | -   | YES | YES | YES |
| 0 | ENSG00000185883 | -                                                              | -   | -   | YES | NO  | YES |
| 0 | ENSG00000185920 | -                                                              | -   | -   | YES | NO  | YES |
| 0 | ENSG00000186111 | -                                                              | -   | -   | YES | NO  | YES |
| 0 | ENSG00000186153 | -                                                              | -   | -   | YES | YES | YES |
| 0 | ENSG00000186260 | -                                                              | -   | -   | NO  | YES | YES |
| 0 | ENSG00000186575 | -                                                              | -   | -   | NO  | YES | YES |
| 0 | ENSG00000186810 | -                                                              | -   | -   | YES | YES | NO  |
| 0 | ENSG00000186895 | -                                                              | -   | -   | YES | NO  | YES |
| 0 | ENSG00000187098 | -                                                              | -   | -   | NO  | YES | YES |
| 0 | ENSG00000187323 | -                                                              | -   | -   | YES | NO  | YES |
| 0 | ENSG00000187391 | -                                                              | -   | -   | YES | NO  | YES |
| 0 | ENSG00000187714 | -                                                              | -   | -   | NO  | YES | YES |
| 0 | ENSG00000187735 | -                                                              | -   | -   | YES | NO  | YES |
| 0 | ENSG00000187908 | Glioblastoma multiforme, 137800; Medulloblastoma, 155255       | YES | NO  | NO  | NO  | YES |
| 0 | ENSG00000188157 | -                                                              | -   | -   | NO  | YES | YES |
| 0 | ENSG00000188566 | -                                                              | -   | -   | YES | YES | NO  |
| 0 | ENSG00000188641 | -                                                              | -   | -   | YES | YES | NO  |
| 0 | ENSG00000188910 | -                                                              | -   | -   | NO  | YES | YES |
| 0 | ENSG00000188986 | -                                                              | -   | -   | YES | NO  | YES |
| 0 | ENSG00000196218 | -                                                              | -   | -   | NO  | YES | YES |
| 0 | ENSG00000196284 | -                                                              | -   | -   | YES | YES | NO  |
| 0 | ENSG00000196367 | -                                                              | -   | -   | YES | NO  | YES |
| 0 | ENSG00000196419 | -                                                              | -   | -   | YES | YES | NO  |
| 0 | ENSG00000196468 | -                                                              | -   | -   | YES | NO  | YES |
| 0 | ENSG00000196588 | -                                                              | -   | -   | YES | NO  | YES |
| 0 | ENSG00000196591 | -                                                              | -   | -   | YES | NO  | YES |
| 0 | ENSG00000196628 | -                                                              | -   | -   | YES | NO  | YES |
| 0 | ENSG00000196712 | -                                                              | -   | -   | NO  | YES | YES |
| 0 | ENSG00000196839 | Severe combined immunodeficiency due to ADA deficiency, 102700 | YES | NO  | NO  | YES | YES |
| 0 | ENSG00000196878 | -                                                              | -   | -   | NO  | YES | YES |
| 0 | ENSG00000197063 | -                                                              | -   | -   | YES | NO  | YES |
| 0 | ENSG00000197081 | -                                                              | -   | -   | YES | NO  | YES |
| 0 | ENSG00000197102 | -                                                              | -   | -   | NO  | YES | YES |
| 0 | ENSG00000197122 | -                                                              | -   | -   | NO  | YES | YES |
| 0 | ENSG00000197283 | -                                                              | -   | -   | YES | YES | YES |

|   |                 |                                                                                                              |     |     |     |     |     |
|---|-----------------|--------------------------------------------------------------------------------------------------------------|-----|-----|-----|-----|-----|
| 0 | ENSG00000197323 | -                                                                                                            | -   | -   | YES | NO  | YES |
| 0 | ENSG00000197381 | -                                                                                                            | -   | -   | NO  | YES | YES |
| 0 | ENSG00000197386 | -                                                                                                            | -   | -   | NO  | YES | YES |
| 0 | ENSG00000197442 | -                                                                                                            | -   | -   | YES | YES | NO  |
| 0 | ENSG00000197461 | -                                                                                                            | -   | -   | NO  | YES | YES |
| 0 | ENSG00000197535 | -                                                                                                            | -   | -   | NO  | YES | YES |
| 0 | ENSG00000197616 | -                                                                                                            | -   | -   | NO  | YES | YES |
| 0 | ENSG00000197746 | Metachromatic leukodystrophy due to<br>deficiency of SAP-1, 249900; Gaucher disease,<br>variant form, 176801 | YES | NO  | NO  | YES | YES |
| 0 | ENSG00000198001 | -                                                                                                            | -   | -   | YES | YES | NO  |
| 0 | ENSG00000198055 | -                                                                                                            | -   | -   | YES | YES | NO  |
| 0 | ENSG00000198400 | -                                                                                                            | -   | -   | NO  | YES | YES |
| 0 | ENSG00000198431 | -                                                                                                            | -   | -   | NO  | YES | YES |
| 0 | ENSG00000198625 | -                                                                                                            | -   | -   | YES | YES | YES |
| 0 | ENSG00000198626 | -                                                                                                            | -   | -   | NO  | YES | YES |
| 0 | ENSG00000198646 | -                                                                                                            | -   | -   | YES | YES | YES |
| 0 | ENSG00000198668 | -                                                                                                            | -   | -   | YES | YES | NO  |
| 0 | ENSG00000198707 | -                                                                                                            | -   | -   | YES | YES | NO  |
| 0 | ENSG00000198719 | -                                                                                                            | -   | -   | YES | YES | YES |
| 0 | ENSG00000198743 | -                                                                                                            | -   | -   | NO  | YES | YES |
| 0 | ENSG00000198793 | -                                                                                                            | -   | -   | YES | YES | YES |
| 0 | ENSG00000198805 | -                                                                                                            | -   | -   | NO  | YES | YES |
| 0 | ENSG00000198807 | Oligodontia, 604625                                                                                          | YES | NO  | NO  | NO  | YES |
| 0 | ENSG00000198814 | -                                                                                                            | -   | -   | YES | YES | YES |
| 0 | ENSG00000198836 | -                                                                                                            | -   | -   | NO  | YES | YES |
| 0 | ENSG00000198900 | -                                                                                                            | -   | -   | NO  | YES | YES |
| 0 | ENSG00000198909 | -                                                                                                            | -   | -   | YES | YES | YES |
| 0 | ENSG00000198917 | -                                                                                                            | -   | -   | YES | NO  | YES |
| 0 | ENSG00000198918 | -                                                                                                            | -   | -   | YES | YES | NO  |
| 0 | ENSG00000198931 | -                                                                                                            | -   | -   | NO  | YES | YES |
| 0 | ENSG00000198947 | -                                                                                                            | -   | -   | NO  | YES | YES |
| 0 | ENSG00000204103 | -                                                                                                            | -   | -   | NO  | YES | YES |
| 0 | ENSG00000204217 | -                                                                                                            | -   | -   | YES | NO  | YES |
| 0 | ENSG00000204262 | -                                                                                                            | -   | -   | YES | NO  | YES |
| 0 | ENSG00000204370 | -                                                                                                            | -   | -   | YES | NO  | YES |
| 0 | ENSG00000204628 | -                                                                                                            | -   | -   | YES | YES | NO  |
| 0 | ENSG00000205560 | -                                                                                                            | -   | -   | YES | NO  | YES |
| 0 | ENSG00000205581 | -                                                                                                            | -   | -   | YES | NO  | YES |
| 0 | ENSG00000213341 | -                                                                                                            | -   | -   | YES | NO  | YES |
| 0 | ENSG00000213585 | -                                                                                                            | -   | -   | NO  | YES | YES |
| 0 | ENSG00000213930 | Galactosemia, 230400                                                                                         | YES | YES | NO  | YES | NO  |
| 0 | ENSG00000214367 | -                                                                                                            | -   | -   | YES | YES | NO  |
| 0 | ENSG00000214517 | -                                                                                                            | -   | -   | YES | NO  | YES |
| 0 | ENSG00000221818 | -                                                                                                            | -   | -   | YES | NO  | YES |
| 0 | ENSG00000221823 | -                                                                                                            | -   | -   | YES | NO  | YES |

0

ENSG00000221983

-

-

-

YES

YES

NO

---
