# Supplementary material for: New genes drive the evolution of gene interaction networks in the human and mouse genomes
Source: PubMed Central journal article supplement (PMC4590697; doi:10.1186/s13059-015-0772-4), 2015-10-01
Supplement: 13059_2015_772_MOESM8_ESM.pdf [file 13059_2015_772_MOESM8_ESM.pdf]

**Table S4:** Characteristics of network topology and brain expression pattern for human lineage-specific hub genes

| <b>Ensembl ID</b> | <b>Gene Symbol</b> | <b>Phylogenetic Branch</b> | <b>PPI Connectivity</b> | <b>Brain Expression Pattern</b> |
|-------------------|--------------------|----------------------------|-------------------------|---------------------------------|
| ENSG00000154608   | CEP170P1           | 12                         | 16                      | Fetus brain biased              |
| ENSG00000145002   | FAM86B2            | 12                         | 15                      | Fetus brain biased              |
| ENSG00000155428   | TRIM74             | 12                         | 41                      | Brain unbiased                  |
| ENSG00000212829   | RPS26P11           | 12                         | 6                       | Brain unbiased                  |
