# Supplementary material for: New genes drive the evolution of gene interaction networks in the human and mouse genomes
Source: PubMed Central journal article supplement (PMC4590697; doi:10.1186/s13059-015-0772-4), 2015-10-01
Supplement: 13059_2015_772_MOESM9_ESM.pdf [file 13059_2015_772_MOESM9_ESM.pdf]

**Table S5: Summary of brain-function related genes with literature evidence**

| Entrez Gene ID | Gene Symbol | Experimental organism(s) | Evidence description                                                                                                                                                                                                                                 | Reference (PMID) |
|----------------|-------------|--------------------------|------------------------------------------------------------------------------------------------------------------------------------------------------------------------------------------------------------------------------------------------------|------------------|
| 862            | RUNX1T1     | Rat                      | RUNX1T1 has highest expression level in brain relative to other organs; Decreased Runx1t1 expression reduced the neuronal differentiation of RGCs, while increased Runx1t1 expression caused a greater number of RGCs to differentiate into neurons. | 25473084         |
| 55885          | LMO3        | Mouse                    | LMO3 is a transcriptional regulator involved in central nervous system development and neuroblastoma.                                                                                                                                                | 25176312         |
| 51225          | ABI3        | Rat                      | ABI3 is one antibody of NT1 neurotensin receptors, and immunoblot experiments that used Abi3 revealed the presence of two differentially glycosylated forms of the NT1 receptor in developing rat brain.                                             | 10940941         |
| 138046         | RALYL       | Human                    | RALYL is expressed in human fetus brain, and was shown to interact with LRRK2, pathogenesis of Parkinson's disease, and other neurodegenerations                                                                                                     | 19001729         |
| 9859           | CEP170      | Human                    | CEP170 was implicated as a novel gene causative for corpus callosal abnormalities (CCA) in patients with a terminal 1q deletion.                                                                                                                     | 21934713         |
| 23357          | SNAPIN      | Human                    | Snapin deficiency is associated with developmental defects of the central nervous system.                                                                                                                                                            | 20946101         |
| 7965           | AIMP2       | Human                    | AIMP2 was reported to be involved in the development of Parkinson's disease.                                                                                                                                                                         | 24786396         |
| 5269           | SERPINB6    | Mouse                    | Serpib6 was claimed as an endogenous inhibitor of neuropsin in brain.                                                                                                                                                                                | 12638128         |
| 57596          | BEGAIN      | Rat                      | BEGAIN was shown to be specifically expressed in brain and enriched in the PSD fraction.                                                                                                                                                             | 9756850          |
| 3801           | KIFC3       | Human; Mouse             | Disturbances of KIF3 could cause the dysregulation of retrograde axonal transports, which would leads to motor neuron degeneration.                                                                                                                  | 23006449         |
| 10381          | TUBB3       | Human                    | Genetic variations affecting all beta-tubulin genes expressed at high levels in the brain (TUBB2B, TUBB3, TUBB, TUBB4A, and TUBB2A) have been linked with malformations of cortical development.                                                     | 24702957         |
| 7280           | TUBB2A      | Human                    | As above                                                                                                                                                                                                                                             | 24702957         |
| 10382          | TUBB4A      | Human                    | As above                                                                                                                                                                                                                                             | 24702957         |
| 10576          | CCT2        | Rat                      | The protein expression of CCT2 was detected in rat brain.                                                                                                                                                                                            | 20049628         |
| 10575          | CCT4        | Human                    | CCT4 was reported to be associated with Alzheimer's.                                                                                                                                                                                                 | 22482075         |
| 10694          | CCT8        |                          | CCT8 was reported to be associated with Down syndrome.                                                                                                                                                                                               |                  |
| 6950           | TCP1        | Mouse                    | Tcp1 was found to be associated with high-affinity choline uptake (HACU) in the mouse brain                                                                                                                                                          | 7665164          |
| 7314           | UBB         | Human                    | UBB was found to be associated with hypothalamic neurodegeneratio.                                                                                                                                                                                   | 22285186         |
| 222484         | LNX2        | Mouse                    | The protein expression of LNX2 was detected in brain tissue.                                                                                                                                                                                         | 25200495         |
| 115992         | RNF166      | Mouse                    | RNF166 was shown to be target gene of TR $\alpha$ 1 (thyroid hormone receptor $\alpha$ 1), which is well recognized for its importance in brain development                                                                                          | 23398480         |

|       |          |              |                                                                                                                                                                                             |          |
|-------|----------|--------------|---------------------------------------------------------------------------------------------------------------------------------------------------------------------------------------------|----------|
| 9958  | USP15    | Human        | USP15 was clearly found to be expressed in brain tissue.                                                                                                                                    | 24852371 |
| 7681  | MKRN3    | Mouse        | Mkrm3 was found preferentially expressed in specific brain regions in mouse.                                                                                                                | 12971993 |
| 648   | BMI1     | Human; Mouse | Bmi1 is down-regulated in the aging brain and displays antioxidant and protective activities in neurons.                                                                                    | 22384090 |
| 672   | BRCA1    | Human; Mouse | Apoptotic and centrosomal functions of BRCA1 in neural progenitors was indicated to be involved in the embryonic brain to DNA damage, as well as the developmental regulation of brain size | 24639535 |
| 7251  | TSG101   | Mouse        | Abnormal regulation of TSG101 was found to be associated with spongiform neurodegeneration in mouse.                                                                                        | 19703557 |
| 9099  | USP2     | Mouse        | Using multiple methods, USP2 expression was clearly observed mouse brain.                                                                                                                   | 14686789 |
| 9921  | RNF10    | Mouse        | RNF10 was found to be deregulated in brain samples of a FXTAS mouse model.                                                                                                                  | 24418349 |
| 51529 | ANAPC11  | Human        | Through Northern blot hybridization, ANAPC11 was detected in brain with moderate signal.                                                                                                    | 11573242 |
| 55743 | CHFR     | Human        | Chfr is frequently methylated in cell lines derived from tumors of brain (100%).                                                                                                            | 12538348 |
| 8454  | CUL1     | Human        | Cul1 was reported to be involved in the pathogenesis of human glioma, a kind of brain tumor.                                                                                                | 25201578 |
| 5885  | RAD21    | Human        | The co-ordinated expression of separase, securin and Rad21 is fundamental for the developing brain.                                                                                         | 17450531 |
| 9768  | KIAA0101 | Mouse        | It was reported the major sites of expression of this gene during mouse embryogenesis include the facial prominences, limbs, somites, brain, spinal cord and hair follicles.                | 16815099 |

---
