# Supplementary material for: New genes drive the evolution of gene interaction networks in the human and mouse genomes
Source: PubMed Central journal article supplement (PMC4590697; doi:10.1186/s13059-015-0772-4), 2015-10-01
Supplement: 13059_2015_772_MOESM10_ESM.pdf [file 13059_2015_772_MOESM10_ESM.pdf]

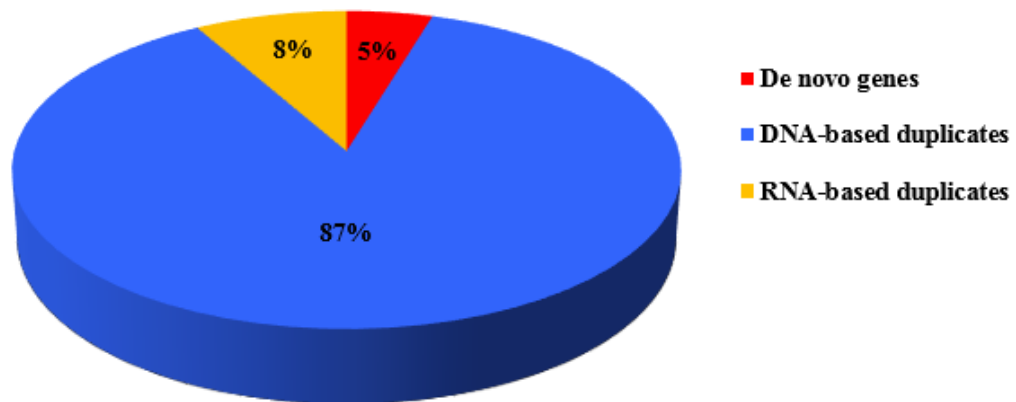

**Figure S5 Distribution of young genes (primate-specific genes) that originated from duplication-based and de novo mechanisms.**
