# Supplementary material for: New genes drive the evolution of gene interaction networks in the human and mouse genomes
Source: PubMed Central journal article supplement (PMC4590697; doi:10.1186/s13059-015-0772-4), 2015-10-01
Supplement: 13059_2015_772_MOESM12_ESM.pdf [file 13059_2015_772_MOESM12_ESM.pdf]

**Table S6: Protein sequence features of young hubs and young non-hubs.**

| Category        | Protein Length<br>(Median) | Low Complexity<br>(%, Median) | Long_Disorder<br>(%, Median) | Short_Disorder<br>(%, Median) |
|-----------------|----------------------------|-------------------------------|------------------------------|-------------------------------|
| <b>Hubs</b>     | 395                        | 6.26%                         | 13.67%                       | 14.62%                        |
| <b>Non-hubs</b> | 436.5                      | 4.12%                         | 6.99%                        | 10.47%                        |

**Note:** Genes (proteins) with minimum interaction degree 6 (medium connectivity) were defined as hubs, the remaining nodes as non-hubs.
